# Supplementary material for: Synthesis, X-ray characterization and theoretical study of all-cis 1,4:2,3:5,8:6,7-tetraepoxynaphthalenes: on the importance of the through-space α-effect
Source: Royal Society of Chemistry journal article supplement (doi:10.1039/d1ce01040a), 2021-01-01
Supplement: d1ce01040a1.pdf [file d1ce01040a1.pdf]

## Supporting Information for the paper

Synthesis, X-ray characterization and theoretical study of all-cis 1,4:2,3:5,8:6,7-tetraepoxynaphthalenes: on the importance of through-space  $\alpha$ -effect

by

Anh T. Le, Van T. T. Tran, Duan T. Le, Rosa M. Gomila, Antonio Frontera, Fedor I. Zubkov

### 1. Experimental section

**General synthetic methods.** All commercially available reagents and solvents were used without further purification. Values of the melting point were measured on a capillary point apparatus equipped with a digital thermometer and were left unchanged.  $^1\text{H}$  NMR and  $^{13}\text{C}$  NMR spectra were recorded on 600 (for  $^1\text{H}$ ) and 150.9 (for  $^{13}\text{C}$ ) MHz spectrometers with TMS ( $^1\text{H}$  and  $^{13}\text{C}$  NMR) as the internal standard, using  $\text{CDCl}_3$  and  $\text{DMSO}-d_6$  as solvents. Data for  $^1\text{H}$  NMR spectra are reported as follows: chemical shift  $\delta$  (ppm), referenced to TMS; multiplicities are indicated as the following: s, singlet; d, doublet; t, triplet; q, quartet; m, multiplet; dd, doublet of doublets; coupling constants (Hz) and integration. Data for  $^{13}\text{C}$  NMR spectra are reported in terms of chemical shift  $\delta$  (ppm) relative to residual solvent peaks. IR spectra were obtained in KBr pellets or in thin films using an Infracum FT-801 IR-Fourier spectrometer. Mass spectral data were collected either on Thermo Focus DSQ II (electron ionization, 70 eV, ion source temperature 200 °C, gas chromatographic inlet with Varian FactorFour VF-5ms column) or on Thermo Trace DSQ (electron ionization, 70 eV, ion source temperature 200 °C, direct inlet probe) spectrometers. High-resolution mass spectra (HRMS) were registered on Agilent mass spectrometer, using ESI-TOF (electrospray ionization-time of flight). Analytical TLC was performed on silica plates Sorbfil (visualization in  $\text{I}_2$  vapors).

# <sup>1</sup>H-NMR and <sup>13</sup>C-NMR spectra of compounds 1b-3b:

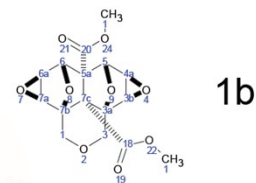

FZ4064-1.JDF

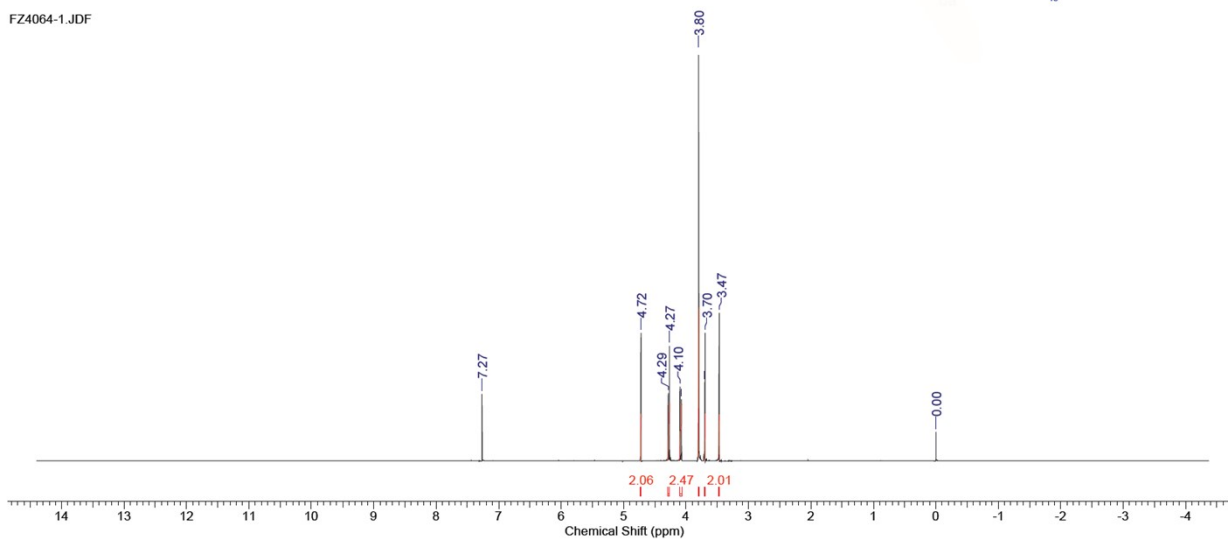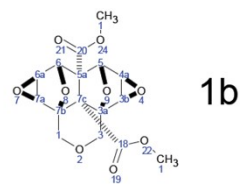

FZ4064-1.JDF

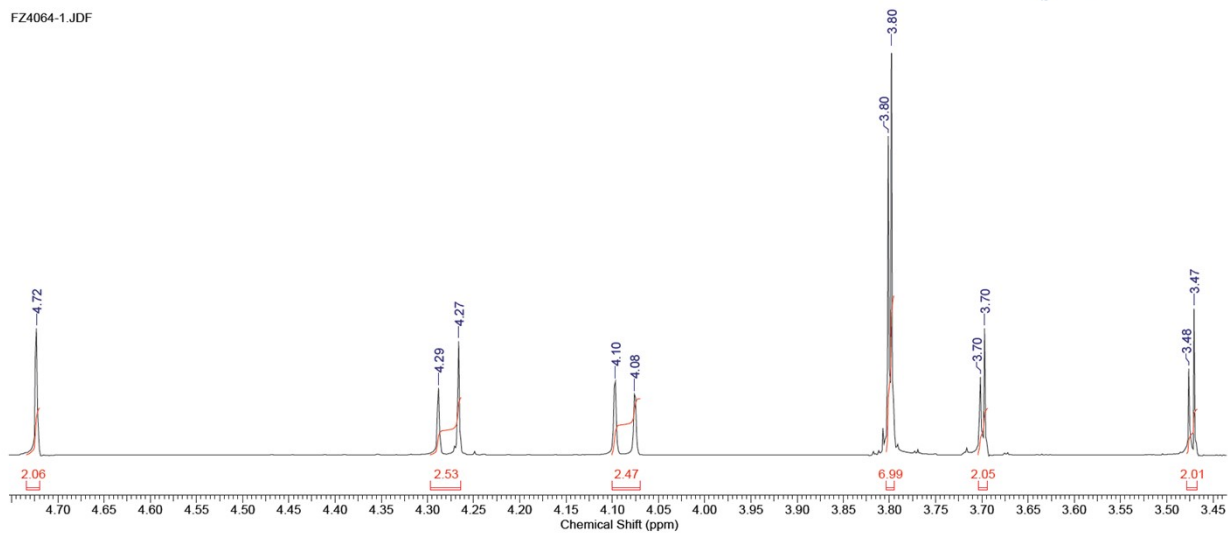

FZ4268-1.JDF

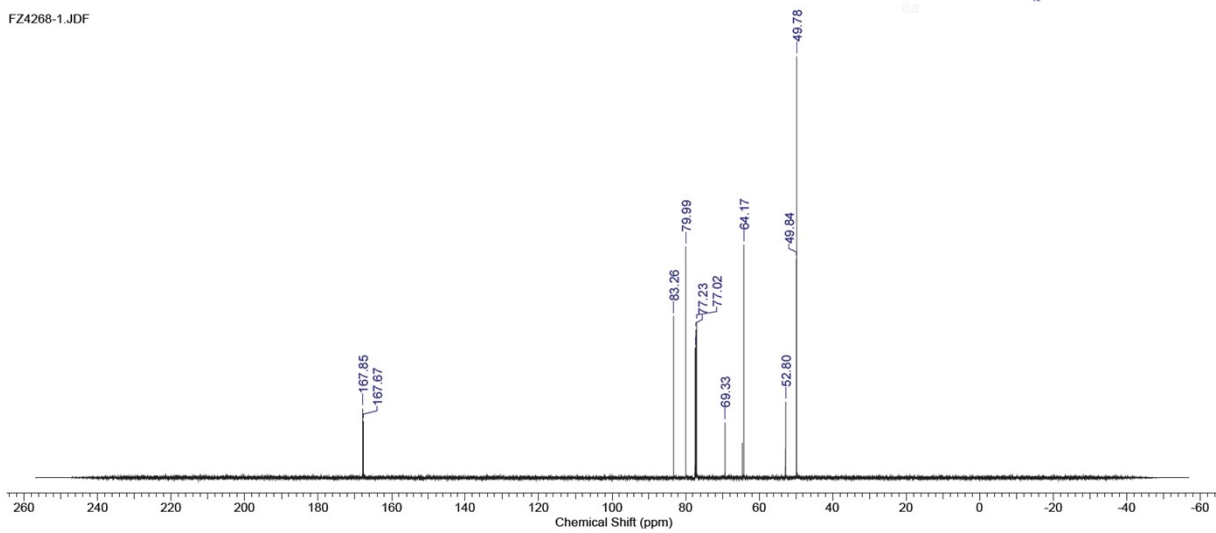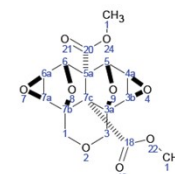

1b

FZ4268-1.JDF

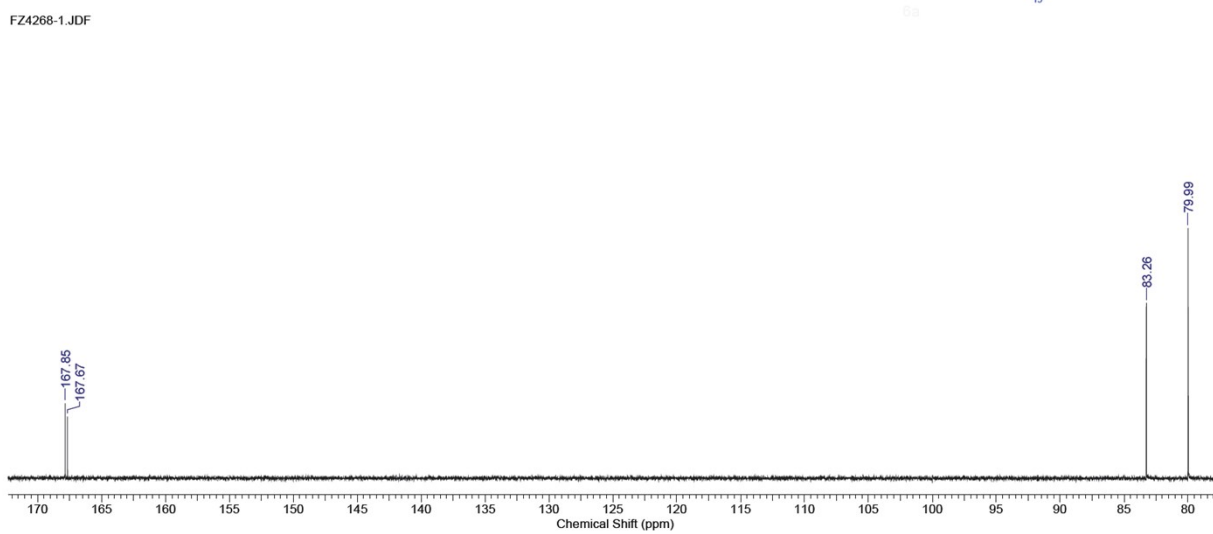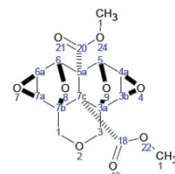

1b

FZ4268-1.JDF

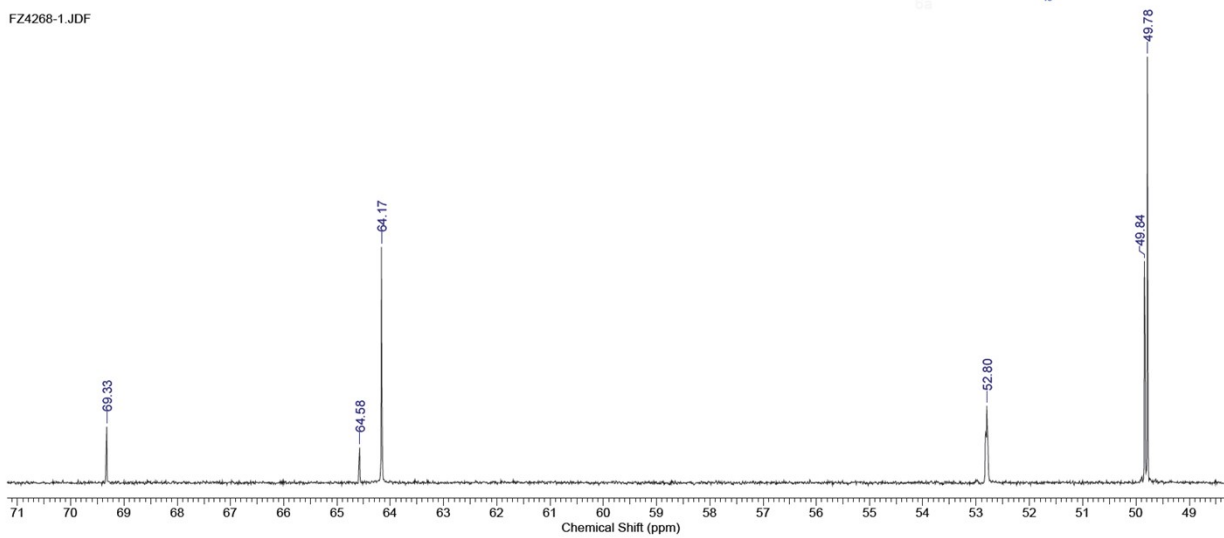

FZ4317-1 (1).JDF

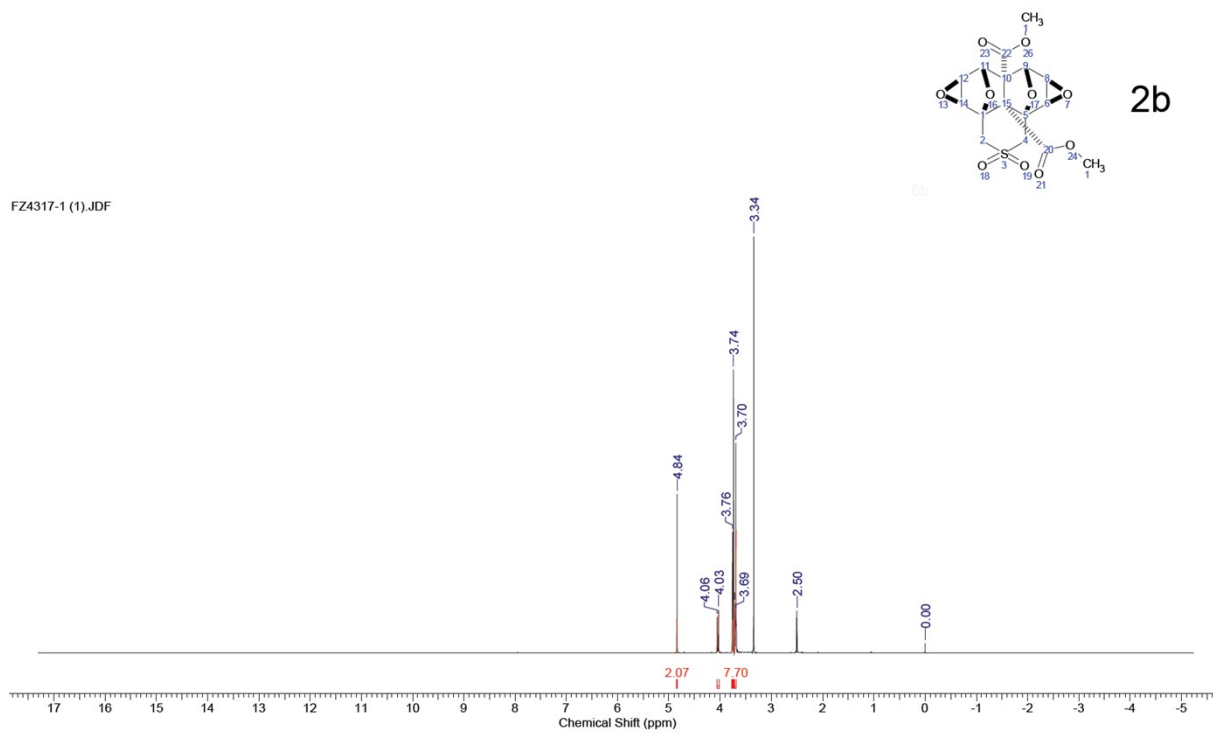

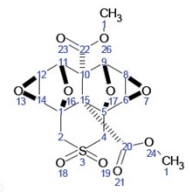

2b

FZ4317-1 (1).JDF

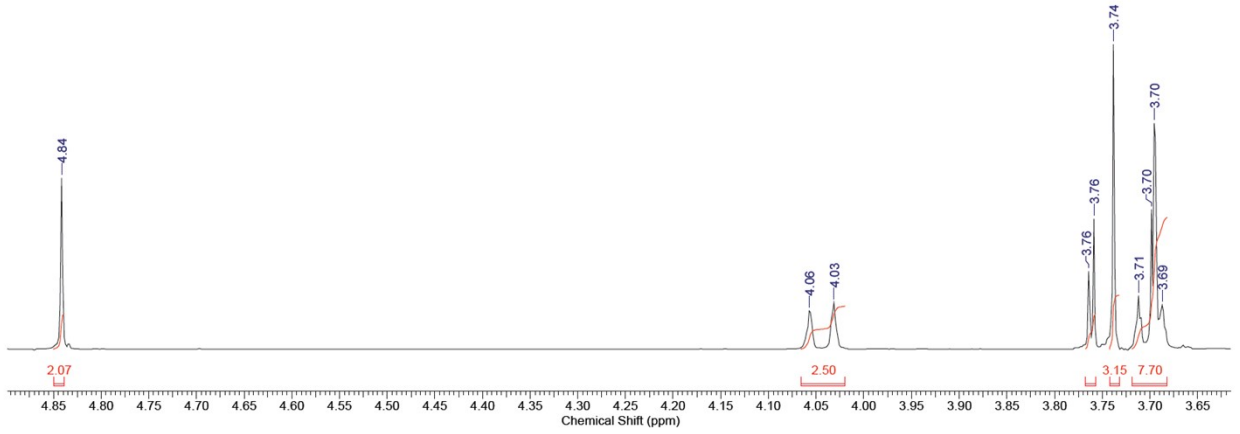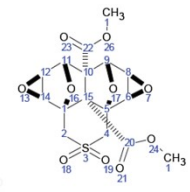

2b

FZ4353-1.JDF

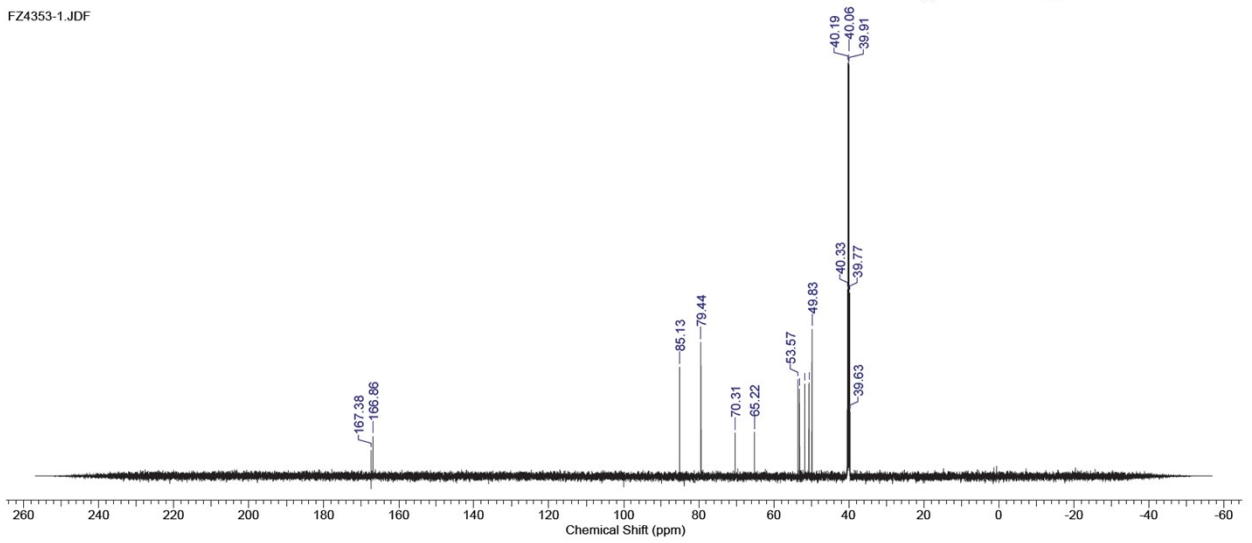

FZ4353-1.JDF

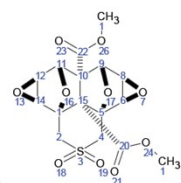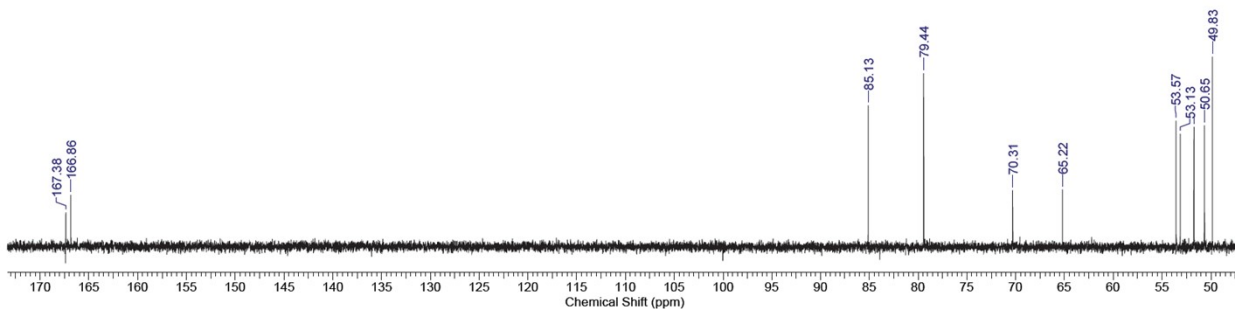

FZ4250-1.JDF

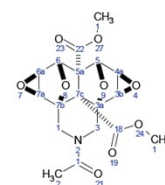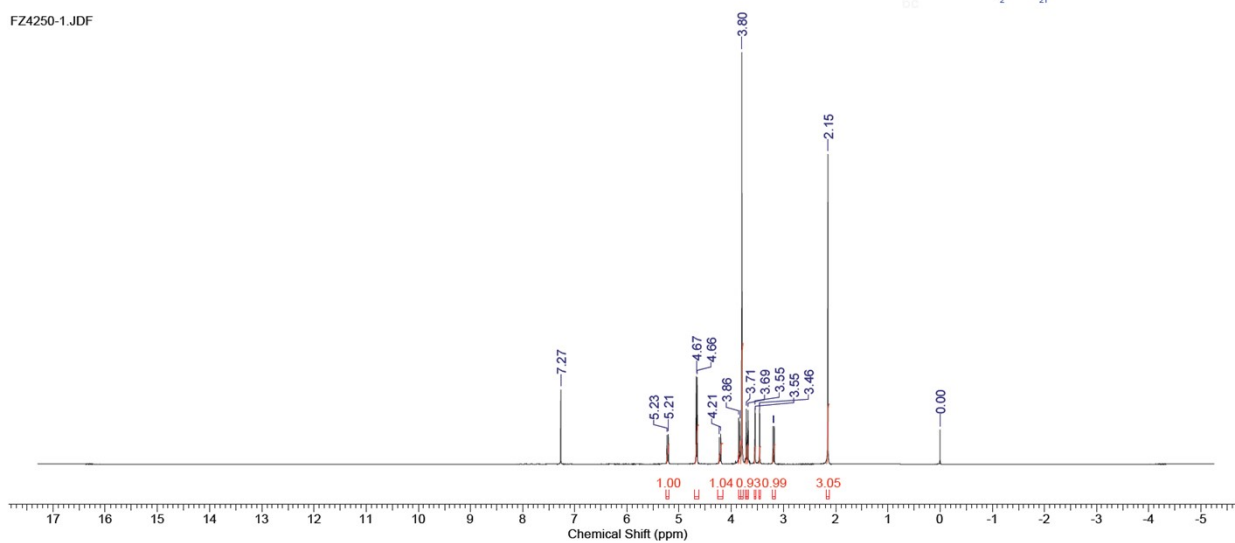

FZ4250-1.JDF

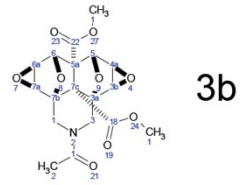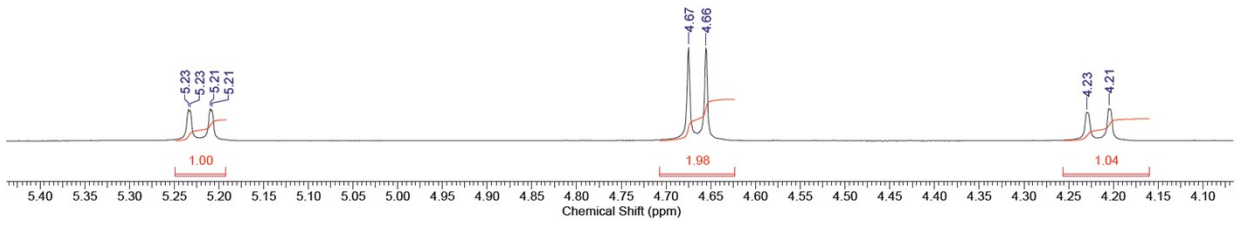

FZ4250-1.JDF

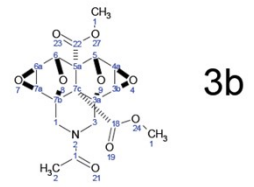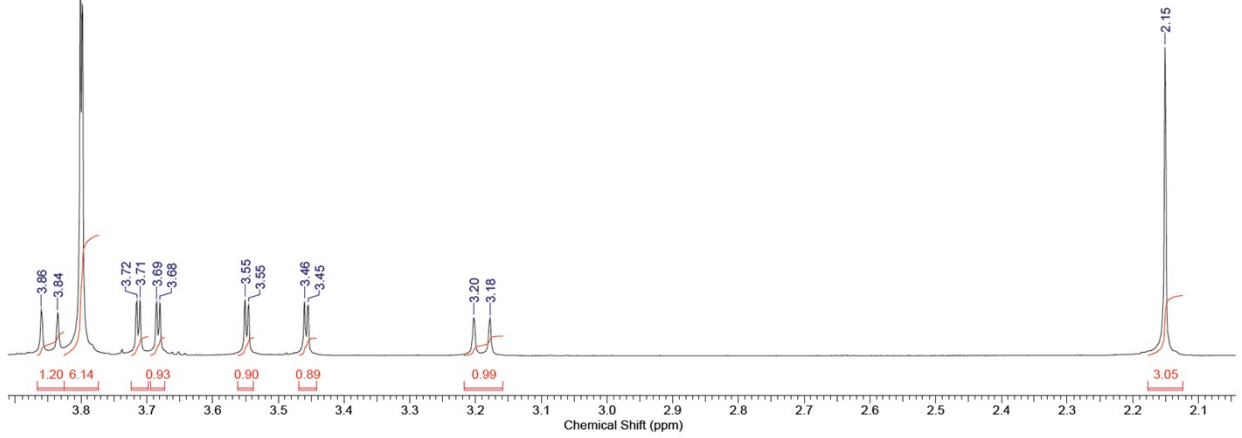

FZ4306-1.JDF

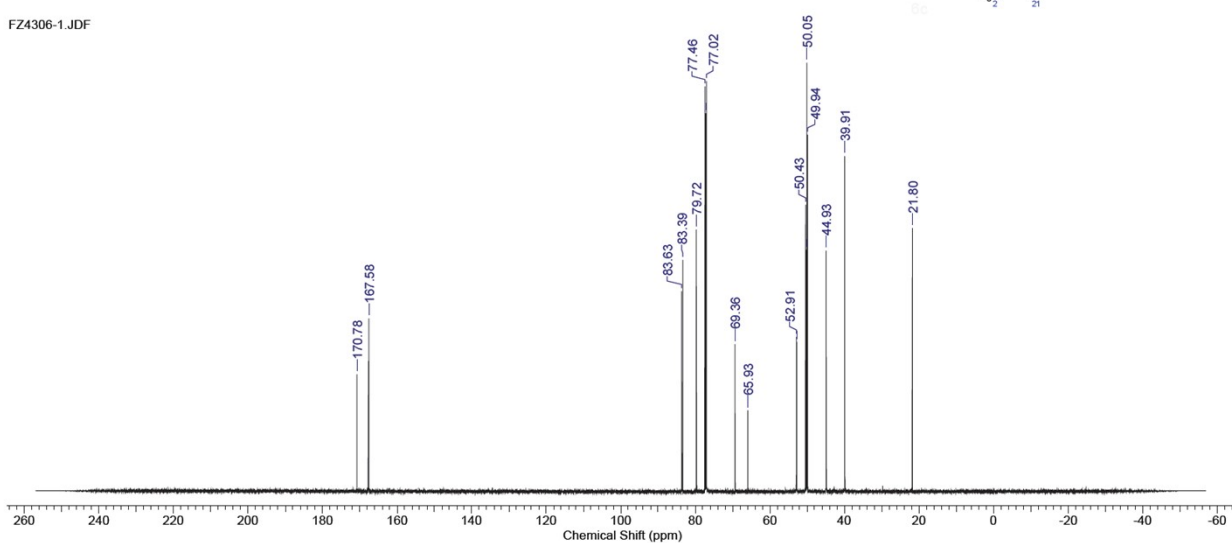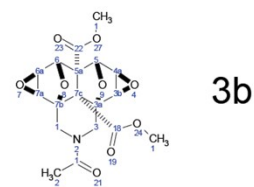

FZ4306-1.JDF

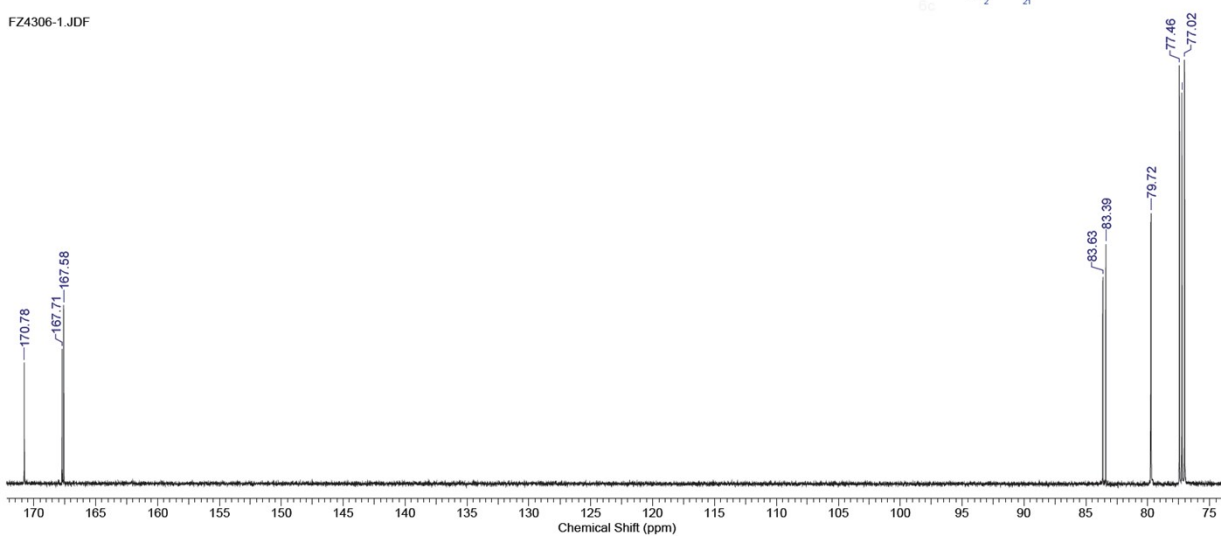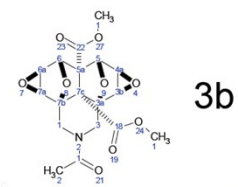



FZ4306-1.JDF

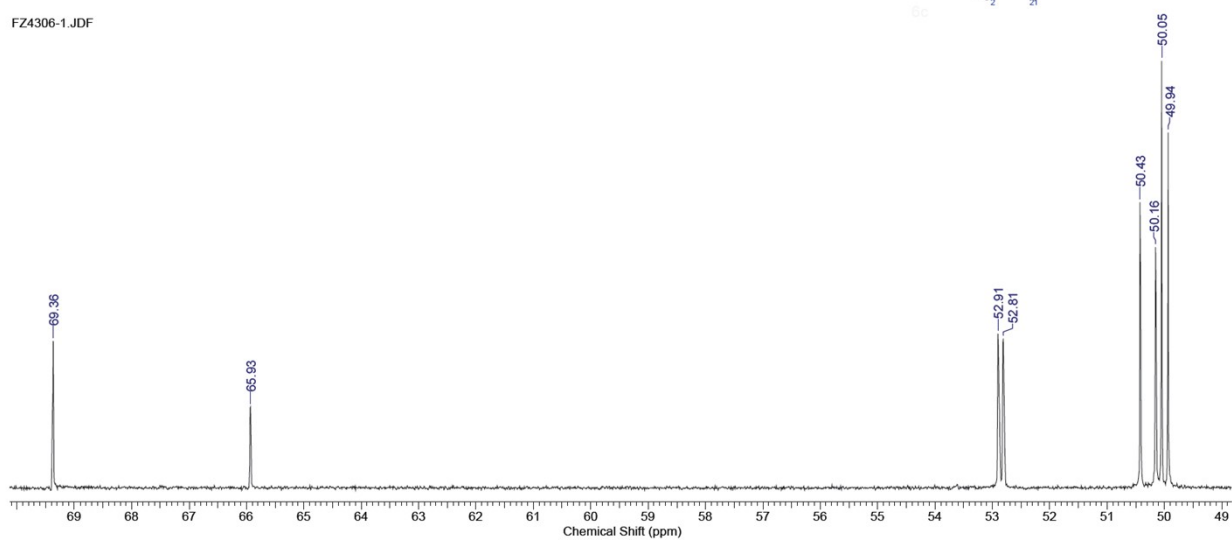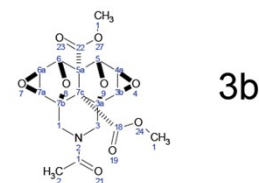

FZ4306-1.JDF

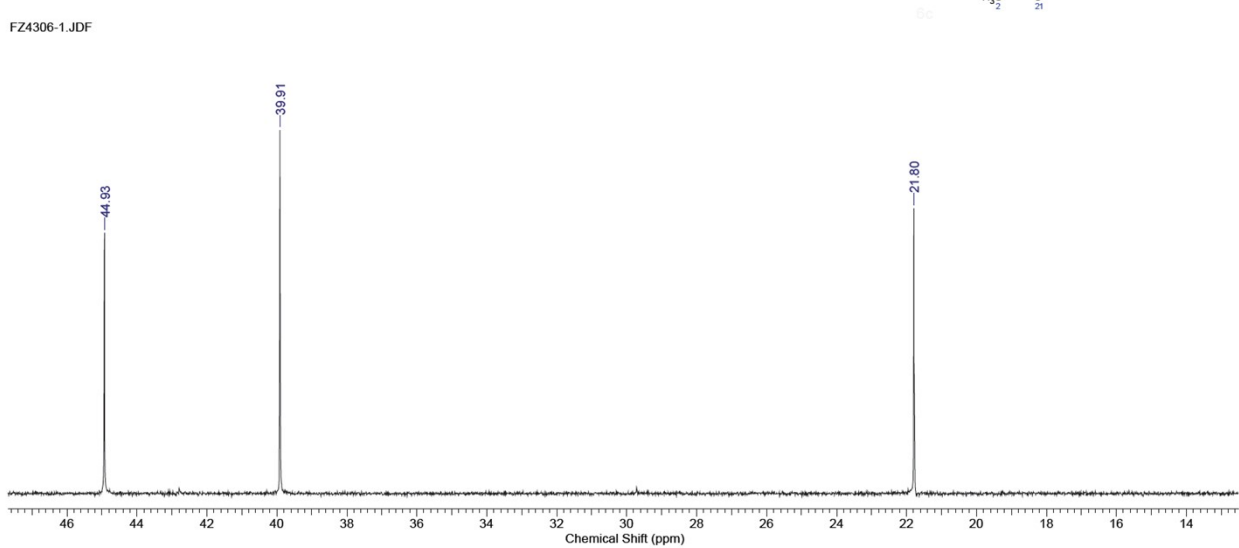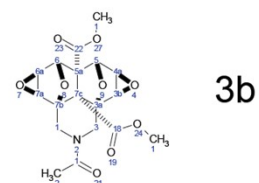

## 1. Theoretical section

### Dimer of compound C (Figure S1)

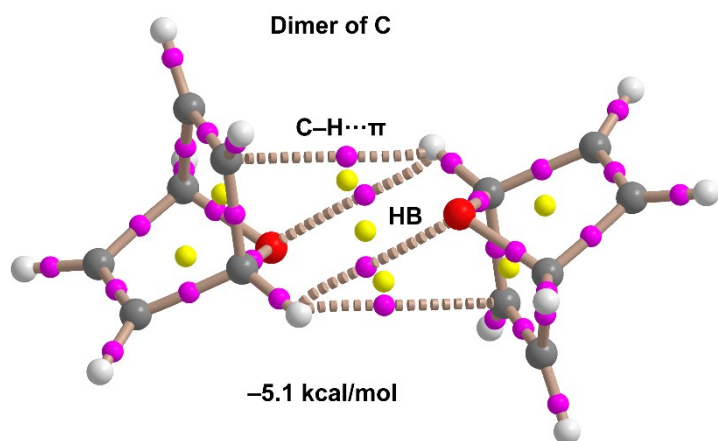

**Figure S1** QTAIM (bond CPs in fuchsia and ring CP in yellow) for the dimers of model C. The dimerization energies are also indicated.

QTAIM data:

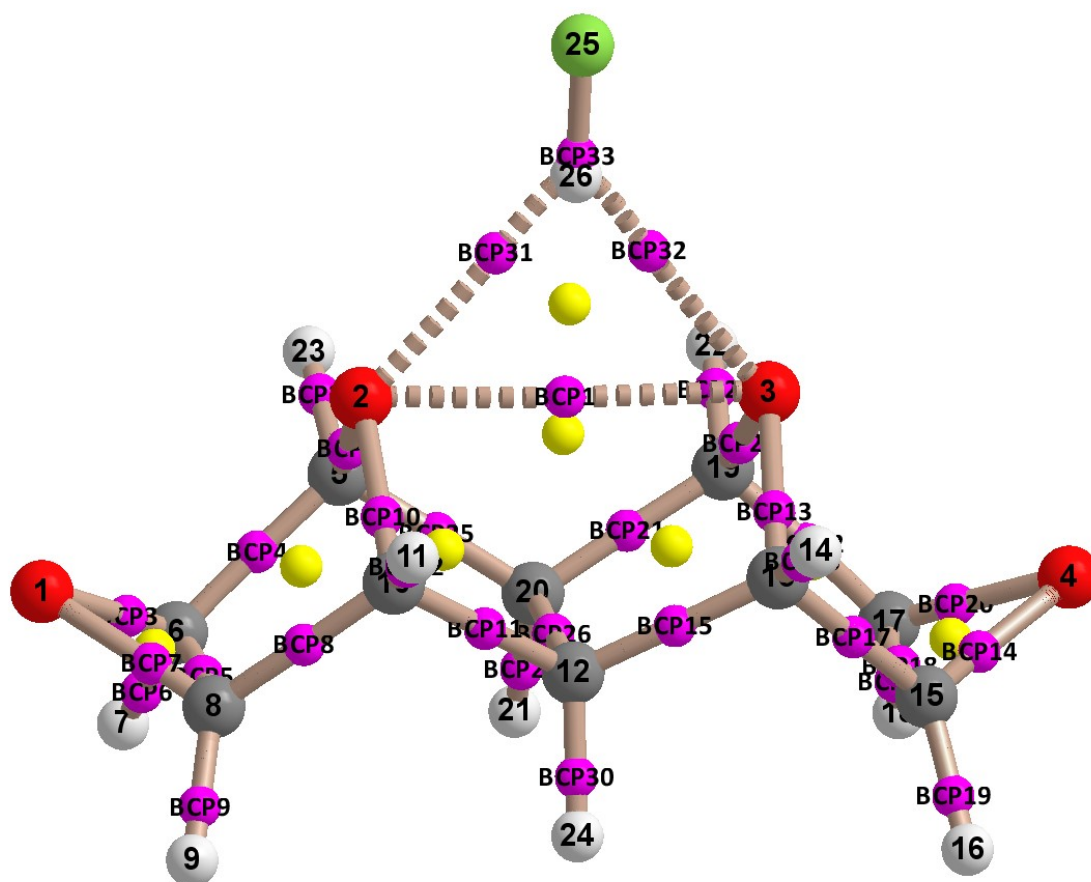

| BCP # | Name | Atoms   | Rho      | DelSqRho  | Ellipticity | V         | G         |
|-------|------|---------|----------|-----------|-------------|-----------|-----------|
| 1     | BCP1 | O2 - O3 | 0.014729 | +0.071406 | 0.458001    | -0.012571 | +0.015211 |
| 2     | BCP2 | O2 - C5 | 0.265317 | -0.612641 | 0.057420    | -0.559669 | +0.203254 |
| 3     | BCP3 | O1 - C6 | 0.262746 | -0.413816 | 0.644907    | -0.580008 | +0.238277 |
| 4     | BCP4 | C5 - C6 | 0.255531 | -0.654362 | 0.086390    | -0.283274 | +0.059842 |

|    |       |           |          |           |          |           |           |
|----|-------|-----------|----------|-----------|----------|-----------|-----------|
| 5  | BCP5  | C6 - C8   | 0.266192 | -0.608676 | 0.301204 | -0.362272 | +0.105052 |
| 6  | BCP6  | C6 - H7   | 0.287703 | -1.038845 | 0.037867 | -0.329758 | +0.035023 |
| 7  | BCP7  | O1 - C8   | 0.262746 | -0.413816 | 0.644907 | -0.580008 | +0.238277 |
| 8  | BCP8  | C8 - C10  | 0.255531 | -0.654362 | 0.086390 | -0.283274 | +0.059842 |
| 9  | BCP9  | C8 - H9   | 0.287703 | -1.038845 | 0.037867 | -0.329758 | +0.035023 |
| 10 | BCP10 | O2 - C10  | 0.265317 | -0.612641 | 0.057420 | -0.559669 | +0.203254 |
| 11 | BCP11 | C10 - C12 | 0.247536 | -0.611328 | 0.022779 | -0.270992 | +0.059080 |
| 12 | BCP12 | C10 - H11 | 0.288571 | -1.047438 | 0.026728 | -0.328060 | +0.033100 |
| 13 | BCP13 | O3 - C13  | 0.265317 | -0.612641 | 0.057420 | -0.559669 | +0.203254 |
| 14 | BCP14 | O4 - C15  | 0.262746 | -0.413816 | 0.644907 | -0.580008 | +0.238277 |
| 15 | BCP15 | C12 - C13 | 0.247536 | -0.611328 | 0.022779 | -0.270992 | +0.059080 |
| 16 | BCP16 | C13 - H14 | 0.288571 | -1.047438 | 0.026728 | -0.328060 | +0.033100 |
| 17 | BCP17 | C13 - C15 | 0.255531 | -0.654362 | 0.086390 | -0.283274 | +0.059842 |
| 18 | BCP18 | C15 - C17 | 0.266192 | -0.608676 | 0.301204 | -0.362272 | +0.105052 |
| 19 | BCP19 | C15 - H16 | 0.287703 | -1.038845 | 0.037867 | -0.329758 | +0.035023 |
| 20 | BCP20 | O4 - C17  | 0.262746 | -0.413816 | 0.644907 | -0.580008 | +0.238277 |
| 21 | BCP21 | C19 - C20 | 0.247536 | -0.611328 | 0.022779 | -0.270992 | +0.059080 |
| 22 | BCP22 | C17 - C19 | 0.255531 | -0.654362 | 0.086390 | -0.283274 | +0.059842 |
| 23 | BCP23 | C17 - H18 | 0.287703 | -1.038845 | 0.037867 | -0.329758 | +0.035023 |
| 24 | BCP24 | O3 - C19  | 0.265317 | -0.612641 | 0.057420 | -0.559669 | +0.203254 |
| 25 | BCP25 | C5 - C20  | 0.247536 | -0.611328 | 0.022779 | -0.270992 | +0.059080 |
| 26 | BCP26 | C12 - C20 | 0.227529 | -0.500075 | 0.037591 | -0.240778 | +0.057880 |
| 27 | BCP27 | C20 - H21 | 0.279421 | -0.964634 | 0.000569 | -0.323128 | +0.040985 |
| 28 | BCP28 | C19 - H22 | 0.288571 | -1.047438 | 0.026728 | -0.328060 | +0.033100 |
| 29 | BCP29 | C5 - H23  | 0.288571 | -1.047438 | 0.026728 | -0.328060 | +0.033100 |
| 30 | BCP30 | C12 - H24 | 0.279421 | -0.964634 | 0.000569 | -0.323128 | +0.040985 |
| 31 | BCP31 | O2 - H26  | 0.017309 | +0.069135 | 0.196885 | -0.012400 | +0.014842 |
| 32 | BCP32 | O3 - H26  | 0.017309 | +0.069135 | 0.196885 | -0.012400 | +0.014842 |
| 33 | BCP33 | F25 - H26 | 0.347758 | -2.611463 | 0.000501 | -0.812370 | +0.079752 |

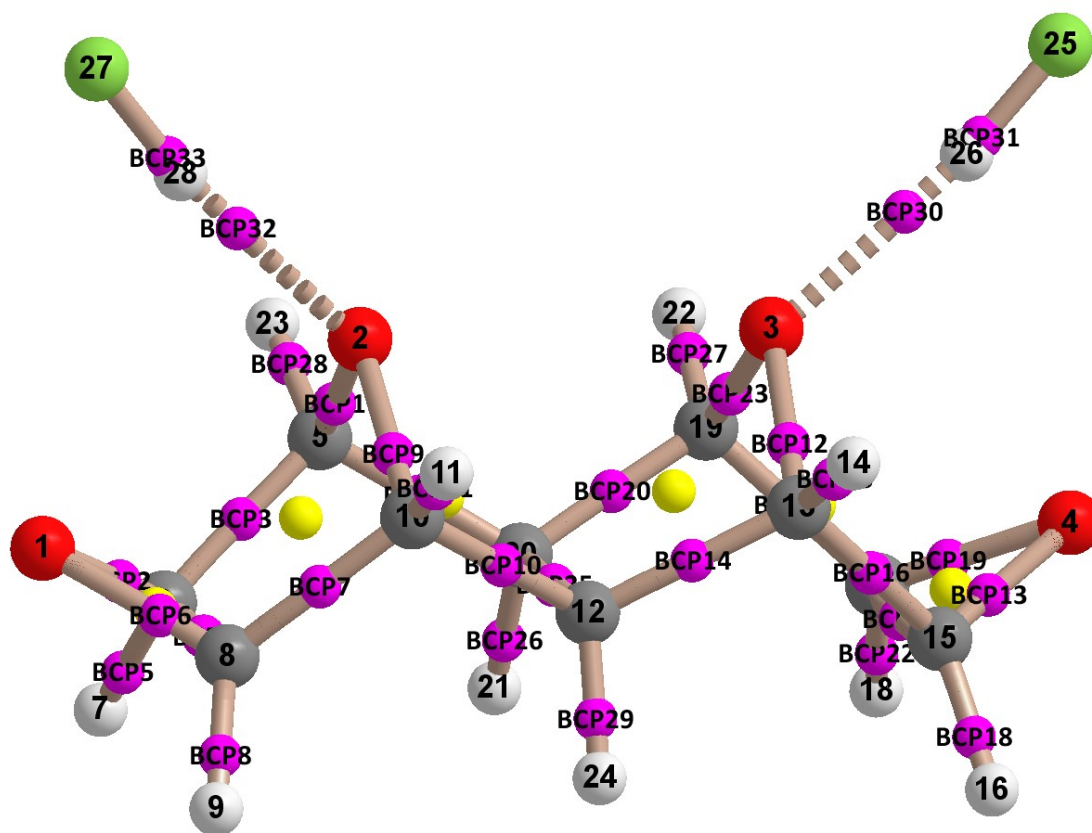

| BCP # | Name | Atoms   | Rho      | DelSqRho  | Ellipticity | V         | G         |
|-------|------|---------|----------|-----------|-------------|-----------|-----------|
| 1     | BCP1 | O2 - C5 | 0.260781 | -0.583540 | 0.056311    | -0.553877 | +0.203996 |
| 2     | BCP2 | O1 - C6 | 0.263458 | -0.419137 | 0.632758    | -0.582112 | +0.238664 |
| 3     | BCP3 | C5 - C6 | 0.255579 | -0.654402 | 0.086744    | -0.283052 | +0.059726 |
| 4     | BCP4 | C6 - C8 | 0.265810 | -0.605657 | 0.307502    | -0.361606 | +0.105096 |

|    |       |           |          |           |          |           |           |
|----|-------|-----------|----------|-----------|----------|-----------|-----------|
| 5  | BCP5  | C6 - H7   | 0.288219 | -1.043905 | 0.036668 | -0.330148 | +0.034586 |
| 6  | BCP6  | O1 - C8   | 0.263458 | -0.419137 | 0.632758 | -0.582112 | +0.238664 |
| 7  | BCP7  | C8 - C10  | 0.255579 | -0.654402 | 0.086744 | -0.283052 | +0.059726 |
| 8  | BCP8  | C8 - H9   | 0.288219 | -1.043905 | 0.036668 | -0.330148 | +0.034586 |
| 9  | BCP9  | O2 - C10  | 0.260781 | -0.583540 | 0.056311 | -0.553877 | +0.203996 |
| 10 | BCP10 | C10 - C12 | 0.248765 | -0.618943 | 0.022455 | -0.273044 | +0.059154 |
| 11 | BCP11 | C10 - H11 | 0.289265 | -1.053614 | 0.026854 | -0.328516 | +0.032556 |
| 12 | BCP12 | O3 - C13  | 0.260781 | -0.583540 | 0.056311 | -0.553877 | +0.203996 |
| 13 | BCP13 | O4 - C15  | 0.263458 | -0.419137 | 0.632758 | -0.582112 | +0.238664 |
| 14 | BCP14 | C12 - C13 | 0.248765 | -0.618943 | 0.022455 | -0.273044 | +0.059154 |
| 15 | BCP15 | C13 - H14 | 0.289265 | -1.053614 | 0.026854 | -0.328516 | +0.032556 |
| 16 | BCP16 | C13 - C15 | 0.255579 | -0.654402 | 0.086744 | -0.283052 | +0.059726 |
| 17 | BCP17 | C15 - C17 | 0.265810 | -0.605657 | 0.307502 | -0.361606 | +0.105096 |
| 18 | BCP18 | C15 - H16 | 0.288219 | -1.043905 | 0.036668 | -0.330148 | +0.034586 |
| 19 | BCP19 | O4 - C17  | 0.263458 | -0.419137 | 0.632758 | -0.582112 | +0.238664 |
| 20 | BCP20 | C19 - C20 | 0.248765 | -0.618943 | 0.022455 | -0.273044 | +0.059154 |
| 21 | BCP21 | C17 - C19 | 0.255579 | -0.654402 | 0.086744 | -0.283052 | +0.059726 |
| 22 | BCP22 | C17 - H18 | 0.288219 | -1.043905 | 0.036668 | -0.330148 | +0.034586 |
| 23 | BCP23 | O3 - C19  | 0.260781 | -0.583540 | 0.056311 | -0.553877 | +0.203996 |
| 24 | BCP24 | C5 - C20  | 0.248765 | -0.618943 | 0.022455 | -0.273044 | +0.059154 |
| 25 | BCP25 | C12 - C20 | 0.227415 | -0.499771 | 0.033753 | -0.240543 | +0.057800 |
| 26 | BCP26 | C20 - H21 | 0.280154 | -0.969859 | 0.000177 | -0.323720 | +0.040627 |
| 27 | BCP27 | C19 - H22 | 0.289265 | -1.053614 | 0.026854 | -0.328516 | +0.032556 |
| 28 | BCP28 | C5 - H23  | 0.289265 | -1.053614 | 0.026854 | -0.328516 | +0.032556 |
| 29 | BCP29 | C12 - H24 | 0.280154 | -0.969859 | 0.000177 | -0.323720 | +0.040627 |
| 30 | BCP30 | O3 - H26  | 0.042617 | +0.115333 | 0.043410 | -0.043680 | +0.036256 |
| 31 | BCP31 | F25 - H26 | 0.338773 | -2.472817 | 0.000449 | -0.787953 | +0.084874 |
| 32 | BCP32 | O2 - H28  | 0.042617 | +0.115333 | 0.043410 | -0.043680 | +0.036256 |
| 33 | BCP33 | F27 - H28 | 0.338773 | -2.472817 | 0.000449 | -0.787953 | +0.084874 |

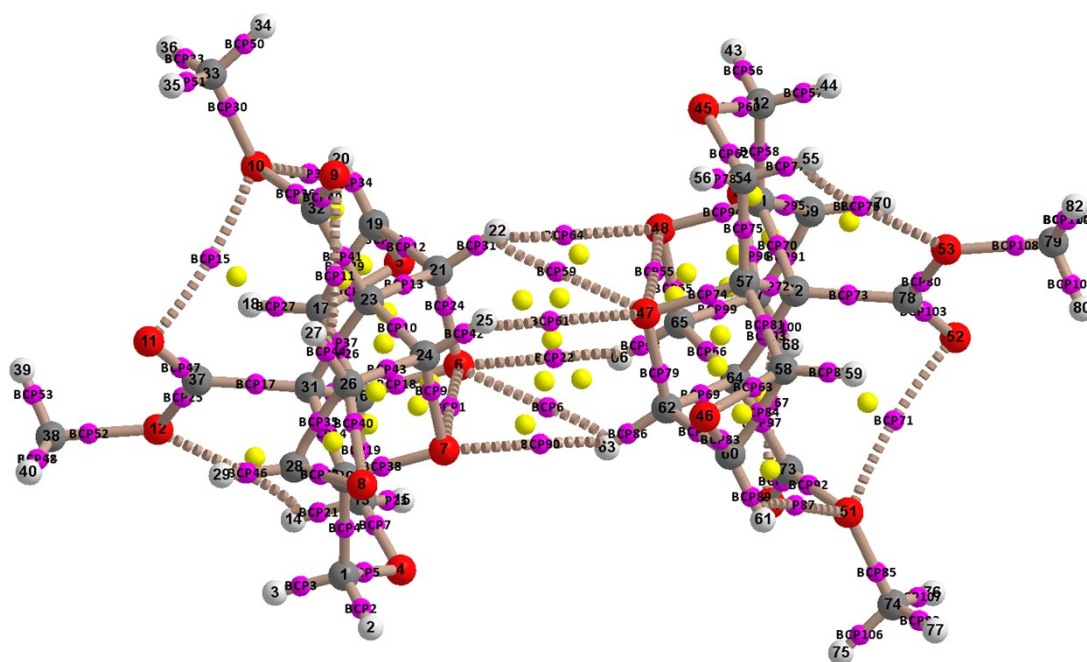

| BCP # | Name  | Atoms     | Rho      | DelSqRho  | Ellipticity | V         | G         |
|-------|-------|-----------|----------|-----------|-------------|-----------|-----------|
| 1     | BCP1  | O6 - O7   | 0.019410 | +0.093470 | 0.073041    | -0.018015 | +0.020691 |
| 2     | BCP2  | C1 - H2   | 0.355843 | -1.530214 | 0.049196    | -0.498550 | +0.057998 |
| 3     | BCP3  | C1 - H3   | 0.353164 | -1.496621 | 0.051209    | -0.502890 | +0.064368 |
| 4     | BCP4  | C1 - C30  | 0.256184 | -0.670704 | 0.056163    | -0.282783 | +0.057553 |
| 5     | BCP5  | C1 - O4   | 0.258026 | -0.574085 | 0.044422    | -0.535404 | +0.195941 |
| 6     | BCP6  | O6 - H63  | 0.008392 | +0.035086 | 0.104048    | -0.005152 | +0.006962 |
| 7     | BCP7  | O4 - C13  | 0.250412 | -0.546427 | 0.051054    | -0.495588 | +0.179491 |
| 8     | BCP8  | O5 - C17  | 0.246966 | -0.345577 | 0.660065    | -0.479715 | +0.196660 |
| 9     | BCP9  | O7 - C24  | 0.255021 | -0.574212 | 0.045245    | -0.496465 | +0.176456 |
| 10    | BCP10 | C23 - C24 | 0.230898 | -0.533891 | 0.043337    | -0.238536 | +0.052532 |

|    |       |           |          |           |          |           |           |
|----|-------|-----------|----------|-----------|----------|-----------|-----------|
| 11 | BCP11 | O9 - H27  | 0.012563 | +0.057401 | 2.087307 | -0.009177 | +0.011764 |
| 12 | BCP12 | C19 - C21 | 0.245799 | -0.605682 | 0.085146 | -0.264192 | +0.056386 |
| 13 | BCP13 | C21 - C23 | 0.225228 | -0.504053 | 0.030190 | -0.231933 | +0.052960 |
| 14 | BCP14 | C30 - C31 | 0.225540 | -0.501470 | 0.024795 | -0.234009 | +0.054321 |
| 15 | BCP15 | O10 - O11 | 0.011241 | +0.054891 | 0.419505 | -0.008177 | +0.010950 |
| 16 | BCP16 | C16 - C31 | 0.232770 | -0.538971 | 0.036205 | -0.243223 | +0.054240 |
| 17 | BCP17 | C31 - C37 | 0.254062 | -0.655204 | 0.081479 | -0.284114 | +0.060157 |
| 18 | BCP18 | O6 - C16  | 0.258266 | -0.593363 | 0.063885 | -0.494473 | +0.173066 |
| 19 | BCP19 | C13 - C16 | 0.259159 | -0.686943 | 0.053277 | -0.288868 | +0.058566 |
| 20 | BCP20 | O12 - H14 | 0.009853 | +0.042229 | 0.925241 | -0.006538 | +0.008547 |
| 21 | BCP21 | C13 - H14 | 0.355392 | -1.514893 | 0.050178 | -0.503523 | +0.062400 |
| 22 | BCP22 | O6 - H66  | 0.007041 | +0.028603 | 0.090501 | -0.004082 | +0.005616 |
| 23 | BCP23 | C13 - H15 | 0.356185 | -1.532833 | 0.050246 | -0.499618 | +0.058205 |
| 24 | BCP24 | O6 - C21  | 0.257577 | -0.583656 | 0.044364 | -0.507809 | +0.180947 |
| 25 | BCP25 | O12 - C37 | 0.307283 | -0.656354 | 0.041784 | -0.809041 | +0.322477 |
| 26 | BCP26 | C16 - C17 | 0.247022 | -0.609330 | 0.088516 | -0.267596 | +0.057632 |
| 27 | BCP27 | C17 - H18 | 0.345100 | -1.453167 | 0.046684 | -0.470078 | +0.053393 |
| 28 | BCP28 | O5 - C19  | 0.243549 | -0.329099 | 0.679934 | -0.473302 | +0.195514 |
| 29 | BCP29 | C17 - C19 | 0.261280 | -0.599949 | 0.244049 | -0.345271 | +0.097642 |
| 30 | BCP30 | O10 - C33 | 0.228370 | -0.381176 | 0.032394 | -0.489966 | +0.197336 |
| 31 | BCP31 | C21 - H22 | 0.353563 | -1.539408 | 0.025432 | -0.475885 | +0.045517 |
| 32 | BCP32 | O10 - H20 | 0.018971 | +0.081705 | 0.218685 | -0.014577 | +0.017502 |
| 33 | BCP33 | C33 - H36 | 0.360258 | -1.556423 | 0.067350 | -0.519353 | +0.065124 |
| 34 | BCP34 | C19 - H20 | 0.347701 | -1.477271 | 0.042289 | -0.471425 | +0.051054 |
| 35 | BCP35 | C26 - C28 | 0.258541 | -0.587467 | 0.243143 | -0.339053 | +0.096093 |
| 36 | BCP36 | O10 - C32 | 0.317311 | -0.623924 | 0.044020 | -0.872938 | +0.358478 |
| 37 | BCP37 | C23 - C31 | 0.222528 | -0.479177 | 0.045405 | -0.231632 | +0.055919 |
| 38 | BCP38 | O7 - C30  | 0.264030 | -0.623250 | 0.067263 | -0.515025 | +0.179606 |
| 39 | BCP39 | C28 - C30 | 0.247341 | -0.609779 | 0.089075 | -0.268483 | +0.058019 |
| 40 | BCP40 | O8 - C26  | 0.239523 | -0.309836 | 0.688811 | -0.454493 | +0.188517 |
| 41 | BCP41 | C23 - C32 | 0.253096 | -0.652544 | 0.066036 | -0.280057 | +0.058461 |
| 42 | BCP42 | C24 - H25 | 0.352925 | -1.531320 | 0.029208 | -0.476430 | +0.046800 |
| 43 | BCP43 | C24 - C26 | 0.247938 | -0.617145 | 0.088082 | -0.267715 | +0.056714 |
| 44 | BCP44 | C26 - H27 | 0.347496 | -1.481193 | 0.041106 | -0.469450 | +0.049576 |
| 45 | BCP45 | O8 - C28  | 0.246435 | -0.348408 | 0.626377 | -0.474485 | +0.193691 |
| 46 | BCP46 | C28 - H29 | 0.346331 | -1.464080 | 0.045463 | -0.472341 | +0.053161 |
| 47 | BCP47 | O11 - C37 | 0.427077 | -0.195230 | 0.124353 | -1.512586 | +0.731889 |
| 48 | BCP48 | C38 - H40 | 0.360752 | -1.558533 | 0.060349 | -0.518308 | +0.064337 |
| 49 | BCP49 | O9 - C32  | 0.423747 | -0.241951 | 0.122329 | -1.486130 | +0.712821 |
| 50 | BCP50 | C33 - H34 | 0.361870 | -1.567838 | 0.060028 | -0.520961 | +0.064500 |
| 51 | BCP51 | C33 - H35 | 0.361744 | -1.567919 | 0.059172 | -0.518916 | +0.063468 |
| 52 | BCP52 | O12 - C38 | 0.229657 | -0.384121 | 0.027843 | -0.495877 | +0.199923 |
| 53 | BCP53 | C38 - H39 | 0.361574 | -1.565712 | 0.059387 | -0.519513 | +0.064042 |
| 54 | BCP54 | C38 - H41 | 0.360450 | -1.558471 | 0.066257 | -0.518533 | +0.064458 |
| 55 | BCP55 | O47 - O48 | 0.019412 | +0.093478 | 0.073011 | -0.018017 | +0.020693 |
| 56 | BCP56 | C42 - H43 | 0.355898 | -1.530677 | 0.049198 | -0.498706 | +0.058018 |
| 57 | BCP57 | C42 - H44 | 0.353104 | -1.496125 | 0.051200 | -0.502711 | +0.064340 |
| 58 | BCP58 | C42 - C71 | 0.256201 | -0.670799 | 0.056153 | -0.282818 | +0.057559 |
| 59 | BCP59 | H22 - O47 | 0.008391 | +0.035081 | 0.104080 | -0.005152 | +0.006961 |
| 60 | BCP60 | C42 - O45 | 0.258011 | -0.574043 | 0.044430 | -0.535296 | +0.195893 |
| 61 | BCP61 | H25 - O47 | 0.007041 | +0.028602 | 0.090501 | -0.004082 | +0.005616 |
| 62 | BCP62 | O45 - C54 | 0.250410 | -0.546403 | 0.051051 | -0.495592 | +0.179496 |
| 63 | BCP63 | O46 - C58 | 0.246967 | -0.345571 | 0.660055 | -0.479707 | +0.196657 |
| 64 | BCP64 | H22 - O48 | 0.007266 | +0.030371 | 0.127431 | -0.004310 | +0.005951 |
| 65 | BCP65 | O48 - C65 | 0.255021 | -0.574220 | 0.045236 | -0.496461 | +0.176453 |
| 66 | BCP66 | C64 - C65 | 0.230898 | -0.533890 | 0.043338 | -0.238536 | +0.052532 |
| 67 | BCP67 | O50 - H68 | 0.012561 | +0.057399 | 2.096240 | -0.009177 | +0.011763 |
| 68 | BCP68 | C60 - C62 | 0.245842 | -0.605902 | 0.085140 | -0.264274 | +0.056399 |
| 69 | BCP69 | C62 - C64 | 0.225242 | -0.504118 | 0.030198 | -0.231959 | +0.052965 |
| 70 | BCP70 | C71 - C72 | 0.225539 | -0.501466 | 0.024791 | -0.234008 | +0.054321 |
| 71 | BCP71 | O51 - O52 | 0.011241 | +0.054890 | 0.419094 | -0.008177 | +0.010950 |
| 72 | BCP72 | C57 - C72 | 0.232769 | -0.538970 | 0.036206 | -0.243223 | +0.054240 |
| 73 | BCP73 | C72 - C78 | 0.254091 | -0.655353 | 0.081477 | -0.284177 | +0.060169 |
| 74 | BCP74 | O47 - C57 | 0.258266 | -0.593366 | 0.063880 | -0.494473 | +0.173066 |
| 75 | BCP75 | C54 - C57 | 0.259158 | -0.686940 | 0.053274 | -0.288868 | +0.058566 |
| 76 | BCP76 | O53 - H55 | 0.009853 | +0.042228 | 0.925233 | -0.006538 | +0.008547 |
| 77 | BCP77 | C54 - H55 | 0.355392 | -1.514904 | 0.050174 | -0.503520 | +0.062397 |
| 78 | BCP78 | C54 - H56 | 0.356209 | -1.533035 | 0.050242 | -0.499686 | +0.058214 |
| 79 | BCP79 | O47 - C62 | 0.257578 | -0.583662 | 0.044380 | -0.507805 | +0.180945 |
| 80 | BCP80 | O53 - C78 | 0.307233 | -0.656604 | 0.041793 | -0.808675 | +0.322262 |

|     |        |           |          |           |          |           |           |
|-----|--------|-----------|----------|-----------|----------|-----------|-----------|
| 81  | BCP81  | C57 - C58 | 0.246985 | -0.609144 | 0.088515 | -0.267528 | +0.057621 |
| 82  | BCP82  | C58 - H59 | 0.345164 | -1.453679 | 0.046681 | -0.470255 | +0.053418 |
| 83  | BCP83  | O46 - C60 | 0.243536 | -0.329007 | 0.680114 | -0.473237 | +0.195493 |
| 84  | BCP84  | C58 - C60 | 0.261291 | -0.600015 | 0.243994 | -0.345291 | +0.097644 |
| 85  | BCP85  | O51 - C74 | 0.228371 | -0.381189 | 0.032426 | -0.489968 | +0.197336 |
| 86  | BCP86  | C62 - H63 | 0.353508 | -1.538957 | 0.025431 | -0.475739 | +0.045500 |
| 87  | BCP87  | O51 - H61 | 0.018972 | +0.081711 | 0.218656 | -0.014578 | +0.017503 |
| 88  | BCP88  | C74 - H77 | 0.360230 | -1.556184 | 0.067349 | -0.519266 | +0.065110 |
| 89  | BCP89  | C60 - H61 | 0.347702 | -1.477272 | 0.042291 | -0.471428 | +0.051055 |
| 90  | BCP90  | O7 - H63  | 0.007266 | +0.030371 | 0.127459 | -0.004310 | +0.059551 |
| 91  | BCP91  | C67 - C69 | 0.258543 | -0.587510 | 0.243044 | -0.339047 | +0.096085 |
| 92  | BCP92  | O51 - C73 | 0.317338 | -0.623758 | 0.044019 | -0.873126 | +0.358593 |
| 93  | BCP93  | C64 - C72 | 0.222495 | -0.479025 | 0.045407 | -0.231572 | +0.055908 |
| 94  | BCP94  | O48 - C71 | 0.264013 | -0.623156 | 0.067272 | -0.514925 | +0.179568 |
| 95  | BCP95  | C69 - C71 | 0.247341 | -0.609784 | 0.089048 | -0.268482 | +0.058018 |
| 96  | BCP96  | O49 - C67 | 0.239478 | -0.309571 | 0.689097 | -0.454264 | +0.188436 |
| 97  | BCP97  | C64 - C73 | 0.253098 | -0.652553 | 0.066037 | -0.280057 | +0.058459 |
| 98  | BCP98  | C65 - H66 | 0.352925 | -1.531322 | 0.029206 | -0.476429 | +0.046799 |
| 99  | BCP99  | C65 - C67 | 0.247937 | -0.617143 | 0.088074 | -0.267713 | +0.056714 |
| 100 | BCP100 | C67 - H68 | 0.347534 | -1.481507 | 0.041107 | -0.469552 | +0.049588 |
| 101 | BCP101 | O49 - C69 | 0.246430 | -0.348406 | 0.626155 | -0.474430 | +0.193664 |
| 102 | BCP102 | C69 - H70 | 0.346319 | -1.463990 | 0.045446 | -0.472304 | +0.053153 |
| 103 | BCP103 | O52 - C78 | 0.427094 | -0.194996 | 0.124352 | -1.512723 | +0.731987 |
| 104 | BCP104 | C79 - H81 | 0.360787 | -1.558834 | 0.060350 | -0.518416 | +0.064354 |
| 105 | BCP105 | O50 - C73 | 0.423747 | -0.241958 | 0.122326 | -1.486127 | +0.712819 |
| 106 | BCP106 | C74 - H75 | 0.361871 | -1.567838 | 0.060029 | -0.520962 | +0.064501 |
| 107 | BCP107 | C74 - H76 | 0.361744 | -1.567924 | 0.059171 | -0.518915 | +0.063467 |
| 108 | BCP108 | O53 - C79 | 0.229691 | -0.384208 | 0.027817 | -0.496047 | +0.199998 |
| 109 | BCP109 | C79 - H80 | 0.361482 | -1.564932 | 0.059371 | -0.519234 | +0.064001 |
| 110 | BCP110 | C79 - H82 | 0.360385 | -1.557915 | 0.066245 | -0.518338 | +0.064429 |

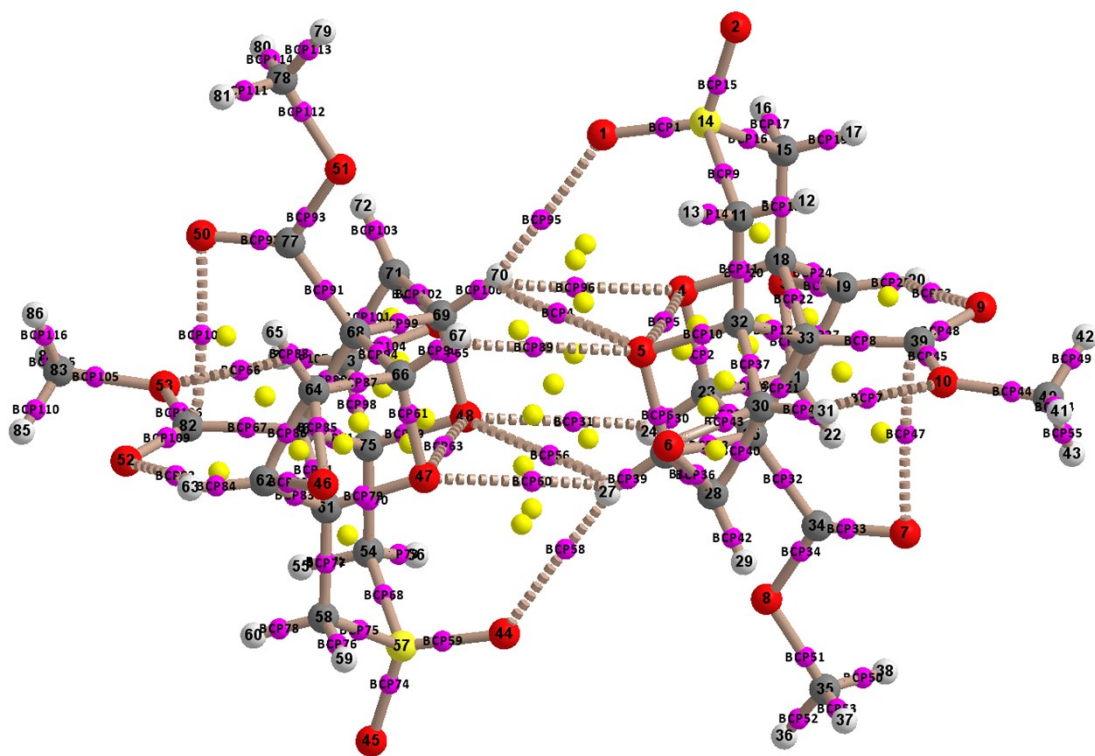

| BCP # | Name | Atoms     | Rho      | DelSqRho  | Ellipticity | V         | G         |
|-------|------|-----------|----------|-----------|-------------|-----------|-----------|
| 1     | BCP1 | O1 - S14  | 0.312188 | +1.003258 | 0.039160    | -1.000885 | +0.625850 |
| 2     | BCP2 | O4 - C23  | 0.253050 | -0.562721 | 0.052681    | -0.476591 | +0.167955 |
| 3     | BCP3 | O3 - C19  | 0.240510 | -0.300690 | 0.745877    | -0.450845 | +0.187836 |
| 4     | BCP4 | O5 - H70  | 0.006267 | +0.026547 | 0.139486    | -0.003679 | +0.005158 |
| 5     | BCP5 | O4 - O5   | 0.019722 | +0.094247 | 0.035256    | -0.018313 | +0.020937 |
| 6     | BCP6 | O5 - C26  | 0.253783 | -0.564909 | 0.042953    | -0.493082 | +0.175927 |
| 7     | BCP7 | O10 - H31 | 0.022827 | +0.099658 | 0.160849    | -0.018591 | +0.021753 |
| 8     | BCP8 | C33 - C39 | 0.246877 | -0.621295 | 0.061428    | -0.267230 | +0.055953 |



|    |       |           |          |           |          |           |           |
|----|-------|-----------|----------|-----------|----------|-----------|-----------|
| 9  | BCP9  | C11 - S14 | 0.211431 | -0.459810 | 0.026556 | -0.211246 | +0.048147 |
| 10 | BCP10 | O5 - C32  | 0.261580 | -0.615189 | 0.084173 | -0.489872 | +0.168037 |
| 11 | BCP11 | C11 - C32 | 0.252373 | -0.642512 | 0.023216 | -0.280986 | +0.060179 |
| 12 | BCP12 | C32 - C33 | 0.221381 | -0.485276 | 0.027166 | -0.222650 | +0.050665 |
| 13 | BCP13 | C11 - H12 | 0.346311 | -1.427572 | 0.019210 | -0.493672 | +0.068389 |
| 14 | BCP14 | C11 - H13 | 0.346284 | -1.434066 | 0.011707 | -0.489316 | +0.065400 |
| 15 | BCP15 | O2 - S14  | 0.308600 | +0.931304 | 0.049612 | -0.975934 | +0.604380 |
| 16 | BCP16 | S14 - C15 | 0.207971 | -0.439407 | 0.024855 | -0.204733 | +0.047441 |
| 17 | BCP17 | C15 - H16 | 0.346301 | -1.436840 | 0.012774 | -0.487895 | +0.064343 |
| 18 | BCP18 | C15 - C18 | 0.248182 | -0.621996 | 0.023818 | -0.272755 | +0.058628 |
| 19 | BCP19 | C15 - H17 | 0.347401 | -1.439439 | 0.019695 | -0.493576 | +0.066858 |
| 20 | BCP20 | O4 - C18  | 0.263538 | -0.627550 | 0.085382 | -0.499864 | +0.171488 |
| 21 | BCP21 | C25 - C33 | 0.220120 | -0.469197 | 0.044624 | -0.227191 | +0.054946 |
| 22 | BCP22 | C18 - C33 | 0.226703 | -0.511220 | 0.032370 | -0.231028 | +0.051612 |
| 23 | BCP23 | O9 - H20  | 0.022517 | +0.095776 | 0.275104 | -0.017971 | +0.020957 |
| 24 | BCP24 | C18 - C19 | 0.248402 | -0.617698 | 0.086114 | -0.270127 | +0.057851 |
| 25 | BCP25 | C19 - H20 | 0.350101 | -1.504373 | 0.044941 | -0.473502 | +0.048704 |
| 26 | BCP26 | O3 - C21  | 0.242140 | -0.309426 | 0.707346 | -0.455874 | +0.189259 |
| 27 | BCP27 | C19 - C21 | 0.266389 | -0.630118 | 0.224018 | -0.354872 | +0.098671 |
| 28 | BCP28 | C21 - C23 | 0.258565 | -0.668994 | 0.086192 | -0.288798 | +0.060775 |
| 29 | BCP29 | C21 - H22 | 0.345426 | -1.456815 | 0.043295 | -0.471435 | +0.053616 |
| 30 | BCP30 | C23 - H24 | 0.353677 | -1.536499 | 0.028329 | -0.478431 | +0.047153 |
| 31 | BCP31 | H24 - O48 | 0.006640 | +0.027093 | 0.065026 | -0.003802 | +0.005288 |
| 32 | BCP32 | C25 - C34 | 0.262846 | -0.704047 | 0.079305 | -0.300046 | +0.062017 |
| 33 | BCP33 | O7 - C34  | 0.416221 | -0.319776 | 0.122446 | -1.431822 | +0.675939 |
| 34 | BCP34 | O8 - C34  | 0.316986 | -0.659880 | 0.052292 | -0.858904 | +0.346967 |
| 35 | BCP35 | C23 - C25 | 0.231497 | -0.534239 | 0.035249 | -0.242678 | +0.054559 |
| 36 | BCP36 | O6 - C28  | 0.233972 | -0.254187 | 0.803661 | -0.420858 | +0.178656 |
| 37 | BCP37 | C30 - C32 | 0.244677 | -0.598904 | 0.082250 | -0.263117 | +0.056695 |
| 38 | BCP38 | C25 - C26 | 0.227749 | -0.517102 | 0.035885 | -0.236518 | +0.053621 |
| 39 | BCP39 | C26 - H27 | 0.355465 | -1.561339 | 0.025904 | -0.478714 | +0.044190 |
| 40 | BCP40 | C28 - C30 | 0.269992 | -0.653782 | 0.201883 | -0.360468 | +0.098512 |
| 41 | BCP41 | C26 - C28 | 0.255383 | -0.653926 | 0.085213 | -0.282268 | +0.059393 |
| 42 | BCP42 | C28 - H29 | 0.345843 | -1.464140 | 0.041274 | -0.470885 | +0.052425 |
| 43 | BCP43 | O6 - C30  | 0.242050 | -0.310346 | 0.697872 | -0.450171 | +0.186292 |
| 44 | BCP44 | O10 - C40 | 0.232887 | -0.356458 | 0.032668 | -0.533325 | +0.222105 |
| 45 | BCP45 | O10 - C39 | 0.315770 | -0.665192 | 0.046943 | -0.852072 | +0.342887 |
| 46 | BCP46 | C30 - H31 | 0.348576 | -1.486105 | 0.045558 | -0.471796 | +0.050135 |
| 47 | BCP47 | O7 - C39  | 0.015563 | +0.062429 | 0.886364 | -0.011048 | +0.013328 |
| 48 | BCP48 | O9 - C39  | 0.426594 | -0.208492 | 0.115968 | -1.508284 | +0.728081 |
| 49 | BCP49 | C40 - H42 | 0.362183 | -1.569350 | 0.058403 | -0.519381 | +0.063522 |
| 50 | BCP50 | C35 - H38 | 0.362386 | -1.572324 | 0.059924 | -0.521868 | +0.064393 |
| 51 | BCP51 | O8 - C35  | 0.225586 | -0.370844 | 0.026780 | -0.481116 | +0.194203 |
| 52 | BCP52 | C35 - H36 | 0.360538 | -1.560759 | 0.065583 | -0.515303 | +0.062556 |
| 53 | BCP53 | C35 - H37 | 0.361461 | -1.565236 | 0.061454 | -0.519970 | +0.064331 |
| 54 | BCP54 | C40 - H41 | 0.360014 | -1.553817 | 0.068471 | -0.519198 | +0.065372 |
| 55 | BCP55 | C40 - H43 | 0.361910 | -1.570366 | 0.062515 | -0.519576 | +0.063492 |
| 56 | BCP56 | H27 - O48 | 0.006268 | +0.026548 | 0.139459 | -0.003680 | +0.005158 |
| 57 | BCP57 | O8 - O44  | 0.001845 | +0.007467 | 0.115901 | -0.000840 | +0.001353 |
| 58 | BCP58 | H27 - O44 | 0.006393 | +0.026275 | 0.018872 | -0.003481 | +0.005025 |
| 59 | BCP59 | O44 - S57 | 0.312225 | +1.004008 | 0.039148 | -1.001136 | +0.626069 |
| 60 | BCP60 | H27 - O47 | 0.006373 | +0.027127 | 0.089672 | -0.003745 | +0.005263 |
| 61 | BCP61 | O47 - C66 | 0.253051 | -0.562738 | 0.052694 | -0.476592 | +0.167954 |
| 62 | BCP62 | O46 - C62 | 0.240515 | -0.300681 | 0.746049 | -0.450867 | +0.187849 |
| 63 | BCP63 | O47 - O48 | 0.019719 | +0.094233 | 0.035227 | -0.018310 | +0.020934 |
| 64 | BCP64 | O1 - O51  | 0.001845 | +0.007468 | 0.115813 | -0.000840 | +0.001353 |
| 65 | BCP65 | O48 - C69 | 0.253781 | -0.564912 | 0.042956 | -0.493059 | +0.175916 |
| 66 | BCP66 | O53 - H74 | 0.022826 | +0.099647 | 0.160762 | -0.018589 | +0.021750 |
| 67 | BCP67 | C76 - C82 | 0.246877 | -0.621294 | 0.061431 | -0.267229 | +0.055953 |
| 68 | BCP68 | C54 - S57 | 0.211441 | -0.459860 | 0.026565 | -0.211265 | +0.048150 |
| 69 | BCP69 | O48 - C75 | 0.261544 | -0.614975 | 0.084178 | -0.489664 | +0.167960 |
| 70 | BCP70 | C54 - C75 | 0.252373 | -0.642507 | 0.023212 | -0.280986 | +0.060179 |
| 71 | BCP71 | C75 - C76 | 0.221381 | -0.485280 | 0.027160 | -0.222648 | +0.050664 |
| 72 | BCP72 | C54 - H55 | 0.346364 | -1.428001 | 0.019214 | -0.493826 | +0.068413 |
| 73 | BCP73 | C54 - H56 | 0.346216 | -1.433521 | 0.011705 | -0.489120 | +0.065370 |
| 74 | BCP74 | O45 - S57 | 0.308584 | +0.930990 | 0.049632 | -0.975830 | +0.604288 |
| 75 | BCP75 | S57 - C58 | 0.207944 | -0.439277 | 0.024853 | -0.204680 | +0.047430 |
| 76 | BCP76 | C58 - H59 | 0.346301 | -1.436844 | 0.012775 | -0.487896 | +0.064343 |
| 77 | BCP77 | C58 - C61 | 0.248182 | -0.621997 | 0.023815 | -0.272757 | +0.058629 |
| 78 | BCP78 | C58 - H60 | 0.347401 | -1.439448 | 0.019697 | -0.493576 | +0.066857 |

|     |        |           |          |           |          |           |           |
|-----|--------|-----------|----------|-----------|----------|-----------|-----------|
| 79  | BCP79  | O47 - C61 | 0.263537 | -0.627531 | 0.085388 | -0.499866 | +0.171492 |
| 80  | BCP80  | C68 - C76 | 0.220099 | -0.469102 | 0.044621 | -0.227154 | +0.054939 |
| 81  | BCP81  | C61 - C76 | 0.226703 | -0.511223 | 0.032369 | -0.231028 | +0.051611 |
| 82  | BCP82  | O52 - H63 | 0.022517 | +0.095772 | 0.275107 | -0.017971 | +0.020957 |
| 83  | BCP83  | C61 - C62 | 0.248438 | -0.617886 | 0.086099 | -0.270196 | +0.057862 |
| 84  | BCP84  | C62 - H63 | 0.350035 | -1.503829 | 0.044935 | -0.473320 | +0.048682 |
| 85  | BCP85  | O46 - C64 | 0.242141 | -0.309378 | 0.707556 | -0.455873 | +0.189264 |
| 86  | BCP86  | C62 - C64 | 0.266414 | -0.630257 | 0.223972 | -0.354927 | +0.098681 |
| 87  | BCP87  | C64 - C66 | 0.258566 | -0.668993 | 0.086192 | -0.288799 | +0.060776 |
| 88  | BCP88  | C64 - H65 | 0.345456 | -1.457055 | 0.043294 | -0.471519 | +0.053628 |
| 89  | BCP89  | O5 - H67  | 0.006640 | +0.027092 | 0.065006 | -0.003802 | +0.005287 |
| 90  | BCP90  | C66 - H67 | 0.353628 | -1.536099 | 0.028323 | -0.478296 | +0.047135 |
| 91  | BCP91  | C68 - C77 | 0.262891 | -0.704288 | 0.079310 | -0.300139 | +0.062034 |
| 92  | BCP92  | O50 - C77 | 0.416220 | -0.319770 | 0.122461 | -1.431823 | +0.675940 |
| 93  | BCP93  | O51 - C77 | 0.316936 | -0.660170 | 0.052315 | -0.858545 | +0.346751 |
| 94  | BCP94  | C66 - C68 | 0.231466 | -0.534089 | 0.035252 | -0.242623 | +0.054551 |
| 95  | BCP95  | O1 - H70  | 0.006393 | +0.026276 | 0.018860 | -0.003481 | +0.005025 |
| 96  | BCP96  | O4 - H70  | 0.006373 | +0.027127 | 0.089659 | -0.003745 | +0.005263 |
| 97  | BCP97  | O49 - C71 | 0.233945 | -0.253968 | 0.804207 | -0.420742 | +0.178625 |
| 98  | BCP98  | C73 - C75 | 0.244662 | -0.598825 | 0.082247 | -0.263088 | +0.056691 |
| 99  | BCP99  | C68 - C69 | 0.227747 | -0.517096 | 0.035899 | -0.236516 | +0.053621 |
| 100 | BCP100 | C69 - H70 | 0.355466 | -1.561347 | 0.025902 | -0.478716 | +0.044189 |
| 101 | BCP101 | C71 - C73 | 0.270018 | -0.653939 | 0.201790 | -0.360518 | +0.098517 |
| 102 | BCP102 | C69 - C71 | 0.255383 | -0.653925 | 0.085211 | -0.282269 | +0.059394 |
| 103 | BCP103 | C71 - H72 | 0.345844 | -1.464143 | 0.041274 | -0.470884 | +0.052424 |
| 104 | BCP104 | O49 - C73 | 0.242053 | -0.310344 | 0.697862 | -0.450156 | +0.186285 |
| 105 | BCP105 | O53 - C83 | 0.232858 | -0.356442 | 0.032681 | -0.533163 | +0.222026 |
| 106 | BCP106 | O53 - C82 | 0.315770 | -0.665194 | 0.046945 | -0.852069 | +0.342885 |
| 107 | BCP107 | C73 - H74 | 0.348535 | -1.485773 | 0.045554 | -0.471685 | +0.050121 |
| 108 | BCP108 | O50 - C82 | 0.015563 | +0.062429 | 0.886506 | -0.011048 | +0.013328 |
| 109 | BCP109 | O52 - C82 | 0.426594 | -0.208498 | 0.115970 | -1.508284 | +0.728080 |
| 110 | BCP110 | C83 - H85 | 0.362135 | -1.568954 | 0.058393 | -0.519235 | +0.063498 |
| 111 | BCP111 | C78 - H81 | 0.362304 | -1.571620 | 0.059918 | -0.521627 | +0.064361 |
| 112 | BCP112 | O51 - C78 | 0.225629 | -0.370897 | 0.026790 | -0.481366 | +0.194321 |
| 113 | BCP113 | C78 - H79 | 0.360550 | -1.560861 | 0.065587 | -0.515346 | +0.062565 |
| 114 | BCP114 | C78 - H80 | 0.361481 | -1.565399 | 0.061459 | -0.520039 | +0.064345 |
| 115 | BCP115 | C83 - H84 | 0.360050 | -1.554129 | 0.068475 | -0.519306 | +0.065387 |
| 116 | BCP116 | C83 - H86 | 0.361992 | -1.571067 | 0.062518 | -0.519818 | +0.063525 |

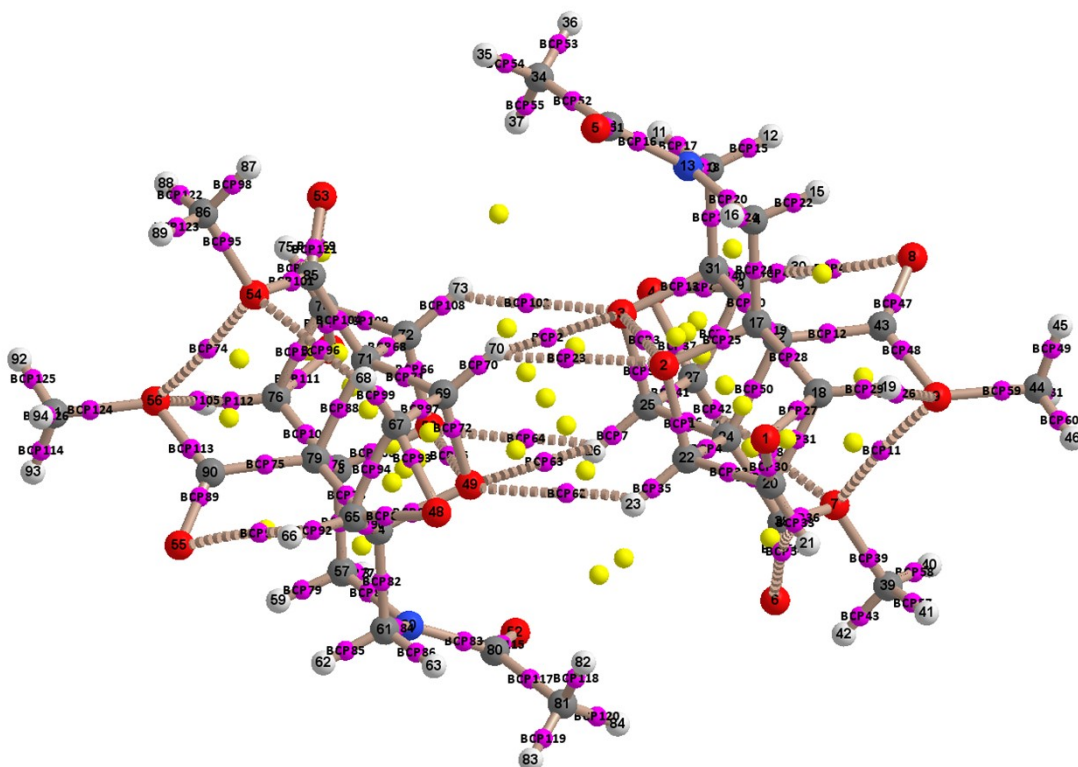



| BCP # | Name  | Atoms     | Rho      | DelSqRho  | Ellipticity | V         | G         |
|-------|-------|-----------|----------|-----------|-------------|-----------|-----------|
| 1     | BCP1  | O2 - C22  | 0.256295 | -0.578104 | 0.047296    | -0.500411 | +0.177942 |
| 2     | BCP2  | O3 - H70  | 0.009747 | +0.040429 | 0.101886    | -0.006133 | +0.008120 |
| 3     | BCP3  | O2 - O3   | 0.020027 | +0.095317 | 0.050036    | -0.018711 | +0.021270 |
| 4     | BCP4  | C22 - C24 | 0.233501 | -0.546246 | 0.043651    | -0.243586 | +0.053512 |
| 5     | BCP5  | O6 - H21  | 0.013817 | +0.062433 | 1.216797    | -0.010238 | +0.012923 |
| 6     | BCP6  | C24 - C25 | 0.229960 | -0.526939 | 0.032132    | -0.240870 | +0.054568 |
| 7     | BCP7  | C25 - H26 | 0.354383 | -1.543503 | 0.025957    | -0.478191 | +0.046158 |
| 8     | BCP8  | O7 - H28  | 0.014423 | +0.062706 | 0.250249    | -0.010398 | +0.013037 |
| 9     | BCP9  | O3 - C25  | 0.252792 | -0.557877 | 0.045480    | -0.486430 | +0.173480 |
| 10    | BCP10 | C31 - C32 | 0.234880 | -0.551178 | 0.037785    | -0.245614 | +0.053910 |
| 11    | BCP11 | O7 - O9   | 0.011082 | +0.053362 | 0.249666    | -0.007886 | +0.010613 |
| 12    | BCP12 | C32 - C43 | 0.256974 | -0.670990 | 0.071964    | -0.289542 | +0.060897 |
| 13    | BCP13 | O3 - C31  | 0.255629 | -0.581293 | 0.068367    | -0.485240 | +0.169958 |
| 14    | BCP14 | C10 - C31 | 0.257313 | -0.675887 | 0.044124    | -0.286585 | +0.058806 |
| 15    | BCP15 | C10 - H12 | 0.353308 | -1.496923 | 0.042358    | -0.499449 | +0.062609 |
| 16    | BCP16 | N13 - C33 | 0.323840 | -1.038799 | 0.162069    | -0.712025 | +0.226163 |
| 17    | BCP17 | C10 - H11 | 0.352347 | -1.490195 | 0.035314    | -0.497035 | +0.062243 |
| 18    | BCP18 | C10 - N13 | 0.255007 | -0.614608 | 0.046017    | -0.392438 | +0.119393 |
| 19    | BCP19 | C17 - C32 | 0.225033 | -0.500346 | 0.024954    | -0.232364 | +0.053639 |
| 20    | BCP20 | N13 - C14 | 0.260440 | -0.649851 | 0.035230    | -0.419166 | +0.128352 |
| 21    | BCP21 | C14 - C17 | 0.257791 | -0.676812 | 0.051685    | -0.289007 | +0.059902 |
| 22    | BCP22 | C14 - H15 | 0.350489 | -1.469965 | 0.048647    | -0.502281 | +0.067395 |
| 23    | BCP23 | O2 - H70  | 0.008009 | +0.033246 | 0.151501    | -0.004798 | +0.006555 |
| 24    | BCP24 | C14 - H16 | 0.355079 | -1.524273 | 0.031636    | -0.493342 | +0.056137 |
| 25    | BCP25 | O2 - C17  | 0.259041 | -0.597443 | 0.068408    | -0.488300 | +0.169470 |
| 26    | BCP26 | O9 - H19  | 0.014780 | +0.063913 | 0.302557    | -0.010717 | +0.013348 |
| 27    | BCP27 | O1 - C18  | 0.245225 | -0.331269 | 0.685023    | -0.469077 | +0.193130 |
| 28    | BCP28 | C17 - C18 | 0.251123 | -0.629840 | 0.087115    | -0.275409 | +0.058974 |
| 29    | BCP29 | C18 - H19 | 0.346100 | -1.460986 | 0.046341    | -0.471345 | +0.053049 |
| 30    | BCP30 | O1 - C20  | 0.244533 | -0.333214 | 0.673296    | -0.475337 | +0.196017 |
| 31    | BCP31 | C18 - C20 | 0.262384 | -0.605897 | 0.243464    | -0.347754 | +0.098140 |
| 32    | BCP32 | C20 - C22 | 0.252101 | -0.638145 | 0.087954    | -0.275800 | +0.058132 |
| 33    | BCP33 | C20 - H21 | 0.347861 | -1.480078 | 0.041864    | -0.471277 | +0.050629 |
| 34    | BCP34 | C24 - C38 | 0.257633 | -0.675846 | 0.066877    | -0.289958 | +0.060498 |
| 35    | BCP35 | C22 - H23 | 0.353021 | -1.530023 | 0.029073    | -0.477380 | +0.047437 |
| 36    | BCP36 | O7 - C38  | 0.319855 | -0.612888 | 0.045745    | -0.889594 | +0.368186 |
| 37    | BCP37 | O4 - C27  | 0.247500 | -0.349165 | 0.665712    | -0.493689 | +0.203199 |
| 38    | BCP38 | C27 - C29 | 0.260864 | -0.594879 | 0.259091    | -0.345561 | +0.098421 |
| 39    | BCP39 | O7 - C39  | 0.227124 | -0.373199 | 0.031746    | -0.488620 | +0.197660 |
| 40    | BCP40 | C29 - C31 | 0.245114 | -0.600623 | 0.089928    | -0.263290 | +0.056567 |
| 41    | BCP41 | C25 - C27 | 0.249361 | -0.623683 | 0.086147    | -0.270588 | +0.057333 |
| 42    | BCP42 | C27 - H28 | 0.347966 | -1.480631 | 0.041542    | -0.472214 | +0.051028 |
| 43    | BCP43 | C39 - H42 | 0.361692 | -1.567659 | 0.060134    | -0.518514 | +0.063300 |
| 44    | BCP44 | O4 - C29  | 0.248291 | -0.351424 | 0.676185    | -0.491354 | +0.201749 |
| 45    | BCP45 | O8 - H30  | 0.012917 | +0.058344 | 1.193031    | -0.009408 | +0.011997 |
| 46    | BCP46 | C29 - H30 | 0.346888 | -1.471625 | 0.046264    | -0.470397 | +0.051245 |
| 47    | BCP47 | O8 - C43  | 0.424366 | -0.231874 | 0.120504    | -1.491472 | +0.716752 |
| 48    | BCP48 | O9 - C43  | 0.312956 | -0.651747 | 0.046181    | -0.841104 | +0.339083 |
| 49    | BCP49 | C44 - H45 | 0.361989 | -1.569106 | 0.058508    | -0.519408 | +0.063566 |
| 50    | BCP50 | C24 - C32 | 0.218076 | -0.457984 | 0.043440    | -0.224662 | +0.055083 |
| 51    | BCP51 | O5 - C33  | 0.403186 | -0.492607 | 0.103551    | -1.326652 | +0.601750 |
| 52    | BCP52 | C33 - C34 | 0.257786 | -0.667951 | 0.052237    | -0.296112 | +0.064562 |
| 53    | BCP53 | C34 - H36 | 0.346556 | -1.420901 | 0.016425    | -0.517002 | +0.080888 |
| 54    | BCP54 | C34 - H35 | 0.352211 | -1.473463 | 0.019776    | -0.513949 | +0.072792 |
| 55    | BCP55 | C34 - H37 | 0.349040 | -1.442244 | 0.015436    | -0.516955 | +0.078197 |
| 56    | BCP56 | O6 - C38  | 0.418132 | -0.308771 | 0.122452    | -1.444027 | +0.683417 |
| 57    | BCP57 | C39 - H41 | 0.361842 | -1.567675 | 0.059818    | -0.520282 | +0.064182 |
| 58    | BCP58 | C39 - H40 | 0.360973 | -1.562834 | 0.067503    | -0.520136 | +0.064714 |
| 59    | BCP59 | O9 - C44  | 0.227836 | -0.378439 | 0.029256    | -0.488718 | +0.197054 |
| 60    | BCP60 | C44 - H46 | 0.360367 | -1.557935 | 0.066935    | -0.518065 | +0.064291 |
| 61    | BCP61 | C44 - H47 | 0.361189 | -1.562610 | 0.062216    | -0.520205 | +0.064776 |
| 62    | BCP62 | H23 - O49 | 0.008046 | +0.032586 | 0.076005    | -0.004764 | +0.006455 |
| 63    | BCP63 | H26 - O49 | 0.011155 | +0.046258 | 0.080962    | -0.007181 | +0.009373 |
| 64    | BCP64 | H26 - O50 | 0.008337 | +0.034885 | 0.178199    | -0.005086 | +0.006904 |
| 65    | BCP65 | O49 - O50 | 0.019760 | +0.094015 | 0.050908    | -0.018362 | +0.020933 |
| 66    | BCP66 | O50 - C72 | 0.255826 | -0.576860 | 0.045438    | -0.496311 | +0.176048 |
| 67    | BCP67 | H37 - O53 | 0.003313 | +0.013127 | 0.234162    | -0.001621 | +0.002451 |
| 68    | BCP68 | C71 - C72 | 0.232601 | -0.541768 | 0.043514    | -0.242061 | +0.053310 |
| 69    | BCP69 | O53 - H75 | 0.013383 | +0.061768 | 3.402860    | -0.010101 | +0.012771 |

|     |        |           |          |           |          |           |           |
|-----|--------|-----------|----------|-----------|----------|-----------|-----------|
| 70  | BCP70  | C69 - H70 | 0.354026 | -1.540278 | 0.026107 | -0.477696 | +0.046313 |
| 71  | BCP71  | C69 - C71 | 0.231262 | -0.533022 | 0.031713 | -0.243334 | +0.055039 |
| 72  | BCP72  | O49 - C69 | 0.253320 | -0.560500 | 0.045178 | -0.488435 | +0.174155 |
| 73  | BCP73  | C64 - C79 | 0.233348 | -0.543934 | 0.037710 | -0.242750 | +0.053383 |
| 74  | BCP74  | O54 - O56 | 0.011071 | +0.053369 | 0.175771 | -0.007890 | +0.010616 |
| 75  | BCP75  | C79 - C90 | 0.257472 | -0.673322 | 0.074266 | -0.290755 | +0.061212 |
| 76  | BCP76  | C78 - C79 | 0.224195 | -0.496248 | 0.024056 | -0.231069 | +0.053503 |
| 77  | BCP77  | C57 - H58 | 0.355224 | -1.524857 | 0.031762 | -0.494168 | +0.056477 |
| 78  | BCP78  | C57 - C78 | 0.257936 | -0.677377 | 0.051617 | -0.289257 | +0.059956 |
| 79  | BCP79  | C57 - H59 | 0.350242 | -1.468546 | 0.048007 | -0.500686 | +0.066775 |
| 80  | BCP80  | C57 - N60 | 0.259765 | -0.645744 | 0.025604 | -0.415193 | +0.126878 |
| 81  | BCP81  | O49 - C64 | 0.254590 | -0.575539 | 0.066888 | -0.480412 | +0.168264 |
| 82  | BCP82  | C61 - C64 | 0.256528 | -0.671815 | 0.043282 | -0.285234 | +0.058640 |
| 83  | BCP83  | N60 - C80 | 0.326298 | -1.052167 | 0.155710 | -0.726883 | +0.231920 |
| 84  | BCP84  | N60 - C61 | 0.253023 | -0.601652 | 0.040256 | -0.383305 | +0.116446 |
| 85  | BCP85  | C61 - H62 | 0.353316 | -1.498257 | 0.041711 | -0.498306 | +0.061871 |
| 86  | BCP86  | C61 - H63 | 0.353218 | -1.497893 | 0.035600 | -0.499267 | +0.062397 |
| 87  | BCP87  | O48 - C65 | 0.247952 | -0.351679 | 0.664502 | -0.489335 | +0.200707 |
| 88  | BCP88  | C71 - C79 | 0.216957 | -0.453127 | 0.043891 | -0.222513 | +0.054616 |
| 89  | BCP89  | O55 - C90 | 0.420003 | -0.284547 | 0.121233 | -1.458683 | +0.693773 |
| 90  | BCP90  | C64 - C65 | 0.246275 | -0.606479 | 0.089146 | -0.265491 | +0.056936 |
| 91  | BCP91  | O55 - H66 | 0.012303 | +0.056293 | 2.306415 | -0.008998 | +0.011536 |
| 92  | BCP92  | C65 - H66 | 0.346717 | -1.470518 | 0.045724 | -0.469858 | +0.051114 |
| 93  | BCP93  | O48 - C67 | 0.245662 | -0.339090 | 0.674971 | -0.483268 | +0.199248 |
| 94  | BCP94  | C65 - C67 | 0.260495 | -0.593865 | 0.255547 | -0.344415 | +0.097974 |
| 95  | BCP95  | O54 - C86 | 0.228662 | -0.375475 | 0.031814 | -0.496548 | +0.201340 |
| 96  | BCP96  | O54 - H68 | 0.013695 | +0.059357 | 0.239421 | -0.009714 | +0.012277 |
| 97  | BCP97  | C67 - C69 | 0.251351 | -0.633548 | 0.086314 | -0.274527 | +0.058070 |
| 98  | BCP98  | C86 - H87 | 0.361963 | -1.569611 | 0.059423 | -0.519240 | +0.063419 |
| 99  | BCP99  | C67 - H68 | 0.347739 | -1.478106 | 0.042088 | -0.472316 | +0.051395 |
| 100 | BCP100 | C74 - C76 | 0.262393 | -0.606462 | 0.241605 | -0.347582 | +0.097983 |
| 101 | BCP101 | O54 - C85 | 0.318586 | -0.625827 | 0.046921 | -0.878769 | +0.361156 |
| 102 | BCP102 | O3 - H73  | 0.008956 | +0.036380 | 0.065270 | -0.005403 | +0.007249 |
| 103 | BCP103 | O51 - C74 | 0.242340 | -0.319516 | 0.691759 | -0.463312 | +0.191717 |
| 104 | BCP104 | C71 - C85 | 0.259409 | -0.684922 | 0.067080 | -0.293650 | +0.061210 |
| 105 | BCP105 | O56 - H77 | 0.014561 | +0.062926 | 0.280859 | -0.010506 | +0.013119 |
| 106 | BCP106 | O50 - C78 | 0.260728 | -0.606489 | 0.066307 | -0.494789 | +0.171583 |
| 107 | BCP107 | C76 - C78 | 0.250927 | -0.628795 | 0.086706 | -0.275083 | +0.058942 |
| 108 | BCP108 | C72 - H73 | 0.352722 | -1.528755 | 0.028682 | -0.475670 | +0.046741 |
| 109 | BCP109 | C72 - C74 | 0.252182 | -0.638655 | 0.087650 | -0.275944 | +0.058140 |
| 110 | BCP110 | C74 - H75 | 0.347648 | -1.478145 | 0.041835 | -0.471188 | +0.050826 |
| 111 | BCP111 | O51 - C76 | 0.246118 | -0.338030 | 0.663029 | -0.471514 | +0.193503 |
| 112 | BCP112 | C76 - H77 | 0.346290 | -1.462349 | 0.046086 | -0.472087 | +0.053250 |
| 113 | BCP113 | O56 - C90 | 0.314573 | -0.644481 | 0.047853 | -0.852342 | +0.345611 |
| 114 | BCP114 | C91 - H93 | 0.361965 | -1.568804 | 0.059237 | -0.520081 | +0.063940 |
| 115 | BCP115 | O52 - C80 | 0.397609 | -0.554684 | 0.104645 | -1.283823 | +0.572576 |
| 116 | BCP116 | O6 - H82  | 0.003988 | +0.015895 | 0.216675 | -0.002002 | +0.002988 |
| 117 | BCP117 | C80 - C81 | 0.262360 | -0.691433 | 0.052662 | -0.305864 | +0.066503 |
| 118 | BCP118 | C81 - H82 | 0.349092 | -1.442751 | 0.014515 | -0.517930 | +0.078621 |
| 119 | BCP119 | C81 - H83 | 0.347533 | -1.427599 | 0.016676 | -0.519534 | +0.081317 |
| 120 | BCP120 | C81 - H84 | 0.352269 | -1.473129 | 0.019756 | -0.514768 | +0.073243 |
| 121 | BCP121 | O53 - C85 | 0.421045 | -0.273319 | 0.121898 | -1.466075 | +0.698872 |
| 122 | BCP122 | C86 - H88 | 0.361460 | -1.564346 | 0.059840 | -0.519408 | +0.064161 |
| 123 | BCP123 | C86 - H89 | 0.360512 | -1.558672 | 0.067174 | -0.518964 | +0.064648 |
| 124 | BCP124 | O56 - C91 | 0.228496 | -0.376473 | 0.030382 | -0.494551 | +0.200217 |
| 125 | BCP125 | C91 - H92 | 0.360691 | -1.560634 | 0.066950 | -0.518982 | +0.064412 |
| 126 | BCP126 | C91 - H94 | 0.361622 | -1.566192 | 0.061183 | -0.520591 | +0.064521 |

**Cartesian coordinates (Dimers 1b-3b are retrieved from the X-ray, the coordinates can be extracted from cif files)**

**A**

|   |           |           |           |
|---|-----------|-----------|-----------|
| 8 | 0.000000  | 3.491556  | -0.113662 |
| 8 | 0.000000  | 1.406273  | 1.261051  |
| 8 | -0.000000 | -1.406273 | 1.261051  |
| 8 | -0.000000 | -3.491556 | -0.113662 |
| 6 | 1.069022  | 1.310843  | 0.338736  |

|   |           |           |           |
|---|-----------|-----------|-----------|
| 6 | 0.729032  | 2.412338  | -0.666035 |
| 1 | 1.343855  | 2.613367  | -1.537095 |
| 6 | -0.729032 | 2.412338  | -0.666035 |
| 1 | -1.343855 | 2.613367  | -1.537095 |
| 6 | -1.069022 | 1.310843  | 0.338736  |
| 1 | -2.022464 | 1.379461  | 0.860389  |
| 6 | -0.783915 | 0.000000  | -0.413970 |
| 6 | -1.069022 | -1.310843 | 0.338736  |
| 1 | -2.022464 | -1.379461 | 0.860389  |
| 6 | -0.729032 | -2.412338 | -0.666035 |
| 1 | -1.343855 | -2.613367 | -1.537095 |
| 6 | 0.729032  | -2.412338 | -0.666035 |
| 1 | 1.343855  | -2.613367 | -1.537095 |
| 6 | 1.069022  | -1.310843 | 0.338736  |
| 6 | 0.783915  | -0.000000 | -0.413970 |
| 1 | 1.224527  | -0.000000 | -1.414291 |
| 1 | 2.022464  | -1.379461 | 0.860389  |
| 1 | 2.022464  | 1.379461  | 0.860389  |
| 1 | -1.224527 | 0.000000  | -1.414291 |

**B**

|   |           |           |           |
|---|-----------|-----------|-----------|
| 8 | -1.369528 | 0.000000  | 1.235186  |
| 8 | 1.369528  | -0.000000 | 1.235186  |
| 6 | -1.320224 | 1.057574  | 0.290754  |
| 6 | -2.430971 | 0.664347  | -0.671200 |
| 6 | -2.430971 | -0.664347 | -0.671200 |
| 6 | -1.320224 | -1.057574 | 0.290754  |
| 1 | -1.393066 | -2.025262 | 0.785414  |
| 6 | 0.000000  | -0.778063 | -0.473788 |
| 6 | 1.320224  | -1.057574 | 0.290754  |
| 1 | 1.393066  | -2.025262 | 0.785414  |
| 6 | 2.430971  | -0.664347 | -0.671200 |
| 6 | 2.430971  | 0.664347  | -0.671200 |
| 6 | 1.320224  | 1.057574  | 0.290754  |
| 6 | 0.000000  | 0.778063  | -0.473788 |
| 1 | 0.000000  | 1.234973  | -1.463346 |
| 1 | 1.393066  | 2.025262  | 0.785414  |
| 1 | -1.393066 | 2.025262  | 0.785414  |
| 1 | -0.000000 | -1.234973 | -1.463346 |
| 1 | -3.004891 | 1.339788  | -1.290443 |
| 1 | -3.004891 | -1.339788 | -1.290443 |
| 1 | 3.004891  | 1.339788  | -1.290443 |
| 1 | 3.004891  | -1.339788 | -1.290443 |

**C**

|   |           |           |           |
|---|-----------|-----------|-----------|
| 8 | 0.000000  | 0.000000  | 1.294868  |
| 6 | 0.000000  | 1.052173  | 0.332267  |
| 6 | -1.238005 | 0.661983  | -0.497120 |
| 6 | -1.238005 | -0.661983 | -0.497120 |
| 6 | -0.000000 | -1.052173 | 0.332267  |
| 1 | 0.000000  | -2.031315 | 0.805660  |
| 6 | 1.238005  | -0.661983 | -0.497120 |
| 6 | 1.238005  | 0.661983  | -0.497120 |
| 1 | 0.000000  | 2.031315  | 0.805660  |
| 1 | -1.896602 | 1.349792  | -1.006644 |
| 1 | -1.896602 | -1.349792 | -1.006644 |
| 1 | 1.896602  | 1.349792  | -1.006644 |
| 1 | 1.896602  | -1.349792 | -1.006644 |

**dimer\_C**

|   |           |          |           |
|---|-----------|----------|-----------|
| 8 | -0.979398 | 0.503349 | -1.607679 |
|---|-----------|----------|-----------|

|                            |           |           |           |
|----------------------------|-----------|-----------|-----------|
| 6                          | -0.973247 | -0.152648 | -2.875723 |
| 6                          | -0.051114 | -1.345568 | -2.557710 |
| 6                          | 0.839401  | -0.862875 | -1.704450 |
| 6                          | 0.445143  | 0.612783  | -1.515683 |
| 1                          | 0.754438  | 1.088552  | -0.589258 |
| 6                          | 0.743370  | 1.332330  | -2.841758 |
| 6                          | -0.146981 | 0.852981  | -3.696926 |
| 1                          | -1.981037 | -0.374426 | -3.219644 |
| 1                          | -0.116397 | -2.327025 | -3.004065 |
| 1                          | 1.691713  | -1.339033 | -1.243513 |
| 1                          | -0.258793 | 1.044647  | -4.754001 |
| 1                          | 1.556667  | 2.022439  | -3.011485 |
| 8                          | 0.979398  | -0.503349 | 1.607679  |
| 6                          | -0.445143 | -0.612783 | 1.515683  |
| 6                          | -0.839401 | 0.862875  | 1.704450  |
| 6                          | 0.051114  | 1.345568  | 2.557710  |
| 6                          | 0.973247  | 0.152648  | 2.875723  |
| 1                          | 1.981037  | 0.374426  | 3.219644  |
| 6                          | 0.146981  | -0.852981 | 3.696926  |
| 6                          | -0.743370 | -1.332330 | 2.841758  |
| 1                          | -0.754438 | -1.088552 | 0.589258  |
| 1                          | -1.691713 | 1.339033  | 1.243513  |
| 1                          | 0.116397  | 2.327025  | 3.004065  |
| 1                          | -1.556667 | -2.022439 | 3.011485  |
| 1                          | 0.258793  | -1.044647 | 4.754001  |
| <b>A ··· HF_bifurcated</b> |           |           |           |
| 8                          | 0.412590  | 3.487759  | 0.000000  |
| 8                          | -0.928984 | 1.384068  | 0.000000  |
| 8                          | -0.928646 | -1.383922 | -0.000000 |
| 8                          | 0.413460  | -3.487529 | -0.000000 |
| 6                          | -0.002066 | 1.304268  | 1.072639  |
| 6                          | 0.982930  | 2.419271  | 0.728952  |
| 1                          | 1.849387  | 2.632831  | 1.345568  |
| 6                          | 0.982930  | 2.419271  | -0.728952 |
| 1                          | 1.849387  | 2.632831  | -1.345568 |
| 6                          | -0.002066 | 1.304268  | -1.072639 |
| 1                          | -0.527921 | 1.367789  | -2.023866 |
| 6                          | 0.759122  | 0.000165  | -0.784898 |
| 6                          | -0.001749 | -1.304128 | -1.072600 |
| 1                          | -0.527609 | -1.367747 | -2.023820 |
| 6                          | 0.983533  | -2.418906 | -0.728950 |
| 1                          | 1.850045  | -2.632273 | -1.345565 |
| 6                          | 0.983533  | -2.418906 | 0.728950  |
| 1                          | 1.850045  | -2.632273 | 1.345565  |
| 6                          | -0.001749 | -1.304128 | 1.072600  |
| 6                          | 0.759122  | 0.000165  | 0.784898  |
| 1                          | 1.757988  | 0.000309  | 1.227519  |
| 1                          | -0.527609 | -1.367747 | 2.023820  |
| 1                          | -0.527921 | 1.367789  | 2.023866  |
| 1                          | 1.757988  | 0.000309  | -1.227519 |
| 9                          | -3.414411 | -0.001698 | 0.000000  |
| 1                          | -2.482676 | 0.002406  | 0.000000  |
| <b>A ··· (HF) 2</b>        |           |           |           |
| 8                          | -0.423878 | 3.767497  | -0.000000 |
| 8                          | -1.321363 | 1.437067  | -0.000000 |
| 8                          | -0.724865 | -1.297337 | 0.000000  |
| 8                          | 1.038535  | -3.051899 | 0.000000  |
| 6                          | -0.401142 | 1.543645  | 1.069479  |
| 6                          | 0.346625  | 2.833231  | 0.729193  |
| 1                          | 1.153751  | 3.215513  | 1.345124  |
| 6                          | 0.346625  | 2.833231  | -0.729193 |

|   |           |           |           |
|---|-----------|-----------|-----------|
| 1 | 1.153751  | 3.215513  | -1.345124 |
| 6 | -0.401142 | 1.543645  | -1.069479 |
| 1 | -0.925530 | 1.499227  | -2.022623 |
| 6 | 0.613811  | 0.422878  | -0.784674 |
| 6 | 0.163287  | -1.014337 | -1.077130 |
| 1 | -0.337673 | -1.195388 | -2.026267 |
| 6 | 1.368164  | -1.886147 | -0.729040 |
| 1 | 2.259115  | -1.909909 | -1.346699 |
| 6 | 1.368164  | -1.886147 | 0.729040  |
| 1 | 2.259115  | -1.909909 | 1.346699  |
| 6 | 0.163287  | -1.014337 | 1.077130  |
| 6 | 0.613811  | 0.422878  | 0.784674  |
| 1 | 1.591788  | 0.633297  | 1.224172  |
| 1 | -0.337673 | -1.195388 | 2.026267  |
| 1 | -0.925530 | 1.499227  | 2.022623  |
| 1 | 1.591788  | 0.633297  | -1.224172 |
| 9 | -2.170723 | -3.485372 | 0.000000  |
| 1 | -1.582783 | -2.751003 | 0.000000  |
